# Supplementary material
Source: MDPI journal article supplement (https://www.mdpi.com/2073-4395/8/10/209)
Supplement: s1 [file s1]

Table S1.1 Diurnal variation in Eh, pH and Eh@pH7 for four rice varieties (IDSA 6, Azucena, IRBLTA2Pi, Nerica4). Regression equations over time and strength of the relationship ( $R^2$  and P values) are given for each variety, for each day of measurement in each of four seasons (I to IV). Corresponding fertilization, sowing times, measurement dates and plant ages (DAS) are indicated. Overall mean and median of  $R^2$  values are indicated. Measurements were made on the middle part of the last photosynthetically active leaf of the main tiller.

| Variety    | Season | Fertilization | Sowing Date | Date       | DAS | Regression Eh vs Hour               | R <sup>2</sup> Eh vs hour | P Eh vs hour | Regression pH vs Hour               | R <sup>2</sup> pH vs hour | P pH vs hour | Regression Eh(pH7) vs Hour          | R <sup>2</sup> Eh(pH7) vs hour | P Eh(pH7) vs hour |
|------------|--------|---------------|-------------|------------|-----|-------------------------------------|---------------------------|--------------|-------------------------------------|---------------------------|--------------|-------------------------------------|--------------------------------|-------------------|
| IDSA 6     | I      | 0             | 12/11/2015  | 1/28/2016  | 48  | $y = 538.15x^2 - 597.59x + 422.65$  | 0.561                     | 0.000        | $y = -5.5522x^2 + 6.2113x + 5.0954$ | 0.349                     | 0.011        | $y = 212.76x^2 - 234.01x + 311.49$  | 0.074                          | 0.444             |
| IDSA 6     | I      | 0             | 12/11/2015  | 2/22/2016  | 73  | $y = 915.17x^2 - 1004x + 528.95$    | 0.803                     | 0.000        | $y = 2.3046x^2 - 1.8319x + 6.469$   | 0.301                     | 0.023        | $y = 1058.6x^2 - 1119.3x + 498.76$  | 0.811                          | 0.000             |
| IDSA 6     | I      | 0             | 12/11/2015  | 2/23/2016  | 74  | $y = 664.35x^2 - 711.43x + 450.18$  | 0.642                     | 0.000        | $y = -4.144x^2 + 5.0136x + 4.9282$  | 0.707                     | 0.000        | $y = 421.4x^2 - 416.99x + 327.96$   | 0.225                          | 0.069             |
| IDSA 6     | II     | NPK           | 4/25/2016   | 6/20/2016  | 56  | $y = 898.52x^2 - 917.2x + 485.73$   | 0.714                     | 0.000        | $y = 0.4688x^2 + 0.0407x + 5.7636$  | 0.435                     | 0.010        | $y = 938.56x^2 - 928.2x + 415.6$    | 0.752                          | 0.000             |
| IDSA 6     | II     | NPK           | 4/25/2016   | 2/21/2016  | 57  | $y = -186.03x^2 + 97.033x + 266.58$ | 0.663                     | 0.000        | $y = 31.234x^2 - 94.826x + 244.3$   | 0.396                     | 0.061        | $y = 31.234x^2 - 94.826x + 244.3$   | 0.396                          | 0.023             |
| IDSA 6     | II     | NPK           | 4/25/2016   | 2/23/2016  | 59  | $y = 343.83x^2 - 407.55x + 378.8$   | 0.727                     | 0.000        | $y = -0.2573x^2 + 0.5324x + 5.7291$ | 0.084                     | 0.519        | $y = 339.23x^2 - 389.43x + 306.85$  | 0.393                          | 0.024             |
| Azucena    | III    | NPK           | 8/12/2016   | 9/20/2016  | 39  | $y = 418.15x^2 - 475.47x + 381.43$  | 0.560                     | 0.001        | $y = 3.6848x^2 - 3.7588x + 6.9719$  | 0.275                     | 0.065        | $y = 647.34x^2 - 714.18x + 385$     | 0.515                          | 0.002             |
| Azucena    | III    | NPK           | 8/12/2016   | 9/21/2016  | 40  | $y = 157.98x^2 - 226.57x + 327.96$  | 0.664                     | 0.000        | $y = 1.0938x^2 - 1.1016x + 6.354$   | 0.066                     | 0.561        | $y = 239.51x^2 - 312.22x + 294.5$   | 0.646                          | 0.000             |
| Azucena    | III    | NPK           | 8/12/2016   | 10/11/2016 | 60  | $y = 138.25x^2 - 170.17x + 328.47$  | 0.318                     | 0.039        | $y = 0.9981x^2 - 0.9262x + 6.0455$  | 0.072                     | 0.529        | $y = 208.01x^2 - 237.99x + 274.95$  | 0.277                          | 0.064             |
| Azucena    | IV     | Hoagland      | 12/2/2016   | 1/10/2017  | 39  | $y = 360.31x^2 - 406.27x + 358.76$  | 0.576                     | 0.000        | $y = -4.3031x^2 + 4.3194x + 5.4268$ | 0.309                     | 0.052        | $y = 138.04x^2 - 189.13x + 274.82$  | 0.364                          | 0.027             |
| Azucena    | IV     | Hoagland      | 12/2/2016   | 1/11/2017  | 40  | $y = 275.76x^2 - 326.39x + 354.77$  | 0.655                     | 0.000        | $y = 0.6109x^2 - 0.6347x + 6.7082$  | 0.010                     | 0.917        | $y = 311.73x^2 - 364.44x + 337.58$  | 0.468                          | 0.003             |
| Azucena    | IV     | Hoagland      | 12/2/2016   | 1/30/2017  | 59  | $y = 470.04x^2 - 528.96x + 416.16$  | 0.698                     | 0.000        | $y = 1.8282x^2 - 2.0903x + 6.377$   | 0.540                     | 0.001        | $y = 582.22x^2 - 658.71x + 380.41$  | 0.753                          | 0.000             |
| IRBLTA-2Pi | I      | 0             | 12/11/2015  | 1/28/2016  | 48  | $y = 464.08x^2 - 535.63x + 421.93$  | 0.634                     | 0.000        | $y = -5.1205x^2 + 5.2303x + 5.366$  | 0.395                     | 0.005        | $y = 163.21x^2 - 229.25x + 326.62$  | 0.480                          | 0.001             |
| IRBLTA-2Pi | I      | 0             | 12/11/2015  | 2/22/2016  | 73  | $y = 621.53x^2 - 660.39x + 438.53$  | 0.460                     | 0.002        | $y = -4.1386x^2 + 4.3053x + 5.1972$ | 0.266                     | 0.039        | $y = 376.54x^2 - 405.32x + 331.41$  | 0.229                          | 0.065             |
| IRBLTA-2Pi | I      | 0             | 12/11/2015  | 2/23/2016  | 74  | $y = 623.21x^2 - 672.59x + 446.53$  | 0.753                     | 0.000        | $y = -4.372x^2 + 4.734x + 5.164$    | 0.268                     | 0.038        | $y = 366.2x^2 - 394.38x + 338.28$   | 0.396                          | 0.005             |
| IRBLTA-2Pi | II     | NPK           | 4/25/2016   | 6/20/2016  | 56  | $y = 453.27x^2 - 505.05x + 400.85$  | 0.733                     | 0.000        | $y = 5.3896x^2 - 4.9605x + 7.2966$  | 0.368                     | 0.025        | $y = 779.62x^2 - 806.79x + 420.24$  | 0.713                          | 0.000             |
| IRBLTA-2Pi | II     | NPK           | 4/25/2016   | 6/21/2016  | 57  | $y = 175.24x^2 - 259.12x + 346.77$  | 0.660                     | 0.000        | $y = 2.2292x^2 - 2.2559x + 6.5518$  | 0.064                     | 0.609        | $y = 317.53x^2 - 405.38x + 323.22$  | 0.508                          | 0.005             |
| IRBLTA-2Pi | II     | NPK           | 4/25/2016   | 6/23/2016  | 59  | $y = -86.108x^2 - 5.148x + 293.65$  | 0.649                     | 0.000        | $y = -2.2226x^2 + 2.124x + 5.7498$  | 0.143                     | 0.315        | $y = -210.63x^2 + 111.26x + 221.98$ | 0.570                          | 0.002             |
| IRBLTA-2Pi | III    | NPK           | 8/12/2016   | 9/20/2016  | 39  | $y = 352.17x^2 - 434.17x + 371.79$  | 0.613                     | 0.000        | $y = -3.301x^2 + 3.856x + 5.2184$   | 0.167                     | 0.213        | $y = 142.31x^2 - 192.97x + 263.95$  | 0.222                          | 0.119             |
| IRBLTA-2Pi | III    | NPK           | 8/12/2016   | 9/21/2016  | 40  | $y = 488.63x^2 - 565.53x + 400.88$  | 0.808                     | 0.000        | $y = 2.3059x^2 - 2.6434x + 6.9917$  | 0.111                     | 0.389        | $y = 608.8x^2 - 707.96x + 397.72$   | 0.662                          | 0.000             |
| IRBLTA-2Pi | III    | NPK           | 8/12/2016   | 10/11/2016 | 60  | $y = 160.52x^2 - 199.58x + 336.68$  | 0.298                     | 0.041        | $y = 2.14x^2 - 2.0708x + 6.6246$    | 0.178                     | 0.171        | $y = 294.85x^2 - 331.41x + 316.55$  | 0.289                          | 0.047             |
| IRBLTA-2Pi | IV     | Hoagland      | 12/2/2016   | 1/10/2017  | 39  | $y = 273.67x^2 - 322.82x + 343.65$  | 0.607                     | 0.000        | $y = -3.0166x^2 + 3.1936x + 5.9759$ | 0.291                     | 0.054        | $y = 93.393x^2 - 130.31x + 281.98$  | 0.430                          | 0.008             |
| IRBLTA-2Pi | IV     | Hoagland      | 12/2/2016   | 1/11/2017  | 40  | $y = 168.6x^2 - 257.14x + 347.41$   | 0.658                     | 0.000        | $y = -0.4896x^2 + 0.6227x + 6.6304$ | 0.103                     | 0.376        | $y = 139.65x^2 - 220.55x + 325.57$  | 0.542                          | 0.001             |
| IRBLTA-2Pi | IV     | Hoagland      | 12/2/2016   | 1/30/2017  | 59  | $y = 421.4x^2 - 441.13x + 378.85$   | 0.711                     | 0.000        | $y = 0.7972x^2 - 1.1993x + 6.3239$  | 0.318                     | 0.032        | $y = 471.41x^2 - 516.93x + 339.72$  | 0.738                          | 0.000             |
| Nerica 4   | I      | 0             | 12/11/2015  | 1/28/2016  | 48  | $y = 376.58x^2 - 465.86x + 404.08$  | 0.554                     | 0.000        | $y = -2.3934x^2 + 2.7405x + 5.6674$ | 0.099                     | 0.334        | $y = 238.48x^2 - 308.89x + 327.24$  | 0.247                          | 0.051             |
| Nerica 4   | I      | 0             | 12/11/2015  | 2/22/2016  | 73  | $y = 428.56x^2 - 488.16x + 406.76$  | 0.483                     | 0.001        | $y = 3.6034x^2 - 3.1382x + 6.7461$  | 0.439                     | 0.002        | $y = 647.99x^2 - 679.89x + 392.74$  | 0.476                          | 0.001             |
| Nerica 4   | I      | 0             | 12/11/2015  | 2/23/2016  | 74  | $y = 593.99x^2 - 637.88x + 434.36$  | 0.850                     | 0.000        | $y = -0.1329x^2 + 0.3468x + 5.957$  | 0.107                     | 0.305        | $y = 591.79x^2 - 623.6x + 373.93$   | 0.709                          | 0.000             |
| Nerica 4   | II     | NPK           | 4/25/2016   | 6/20/2016  | 56  | $y = 192.85x^2 - 242.92x + 325.91$  | 0.558                     | 0.000        | $y = 3.328x^2 - 2.4347x + 6.317$    | 0.597                     | 0.001        | $y = 983.05x^2 - 965.24x + 423.61$  | 0.836                          | 0.000             |
| Nerica 4   | II     | NPK           | 4/25/2016   | 2/21/2016  | 57  | $y = 86.11x^2 - 141.29x + 307.29$   | 0.545                     | 0.003        | $y = 2.3342x^2 - 2.1622x + 6.424$   | 0.296                     | 0.072        | $y = 238x^2 - 285.51x + 277$        | 0.459                          | 0.010             |
| Nerica 4   | II     | NPK           | 4/25/2016   | 2/23/2016  | 59  | $y = 197.35x^2 - 258.87x + 332.42$  | 0.733                     | 0.000        | $y = 4.8873x^2 - 3.9603x + 6.6404$  | 0.607                     | 0.001        | $y = 502.66x^2 - 511.8x + 315.54$   | 0.579                          | 0.002             |
| Nerica 4   | III    | NPK           | 8/12/2016   | 9/20/2016  | 39  | $y = 646.85x^2 - 672.72x + 410.04$  | 0.623                     | 0.000        | $y = 1.3856x^2 - 1.2464x + 6.4386$  | 0.125                     | 0.301        | $y = 734.61x^2 - 754.13x + 378.78$  | 0.732                          | 0.000             |
| Nerica 4   | III    | NPK           | 8/12/2016   | 9/21/2016  | 40  | $y = 460.9x^2 - 520.07x + 376.65$   | 0.575                     | 0.000        | $y = 0.8986x^2 - 1.2252x + 6.5572$  | 0.113                     | 0.339        | $y = 521.15x^2 - 601.66x + 352.5$   | 0.588                          | 0.000             |
| Nerica 4   | III    | NPK           | 8/12/2016   | 10/11/2016 | 60  | $y = 349.74x^2 - 413.15x + 383.92$  | 0.688                     | 0.000        | $y = 1.1133x^2 - 1.309x + 6.2656$   | 0.097                     | 0.399        | $y = 426.76x^2 - 504.2x + 343.62$   | 0.712                          | 0.000             |
| Nerica 4   | IV     | Hoagland      | 12/2/2016   | 1/10/2017  | 39  | $y = 377.91x^2 - 429.66x + 361.18$  | 0.589                     | 0.000        | $y = -4.299x^2 + 4.215x + 5.5099$   | 0.539                     | 0.001        | $y = 119.76x^2 - 177.45x + 272.39$  | 0.471                          | 0.003             |
| Nerica 4   | IV     | Hoagland      | 12/2/2016   | 1/11/2017  | 40  | $y = 193.04x^2 - 255.42x + 329.53$  | 0.603                     | 0.000        | $y = 0.2848x^2 - 0.5243x + 6.6138$  | 0.137                     | 0.267        | $y = 134.39x^2 - 219.49x + 292.77$  | 0.625                          | 0.000             |
| Nerica 4   | IV     | Hoagland      | 12/2/2016   | 1/30/2017  | 59  | $y = 485.63x^2 - 563.92x + 418.96$  | 0.843                     | 0.000        | $y = 0.0899x^2 - 0.4666x + 5.9936$  | 0.521                     | 0.001        | $y = 493.12x^2 - 595.99x + 360.17$  | 0.860                          | 0.000             |
| Mean       |        |               |             |            |     |                                     | 0.634                     |              |                                     | 0.275                     |              |                                     | 0.521                          |                   |
| Median     |        |               |             |            |     |                                     | 0.646                     |              |                                     | 0.272                     |              |                                     | 0.511                          |                   |

Table S1.2 Temperature dependent variation in Eh, pH and Eh@pH7 for four rice varieties (IDSA 6, Azucena, IRBLTA2Pi, Nerica4). Regression equations over time and strength of the relationship ( $R^2$  and P values) are given for each variety, for each day of measurement in each of four seasons (I to IV). Corresponding fertilization, sowing times, measurement dates and plant ages (DAS) are indicated. Overall mean and median of  $R^2$  values are indicated. Measurements were made on the middle part of the last photosynthetically active leaf of the main tiller.

| Variety    | Season | Fertilization | Sowing Date | Date       | DAS | Regression Eh vs Temperature        | R <sup>2</sup> Eh vs Temp. | P Eh vs Temp. | Regression pH vs Temperature        | R <sup>2</sup> pH vs Temp. | P pH vs Temp. | Regression Eh(pH7) vs Temperature   | R <sup>2</sup> Eh(pH7) vs Temp. | P Eh(pH7) vs Temp. |
|------------|--------|---------------|-------------|------------|-----|-------------------------------------|----------------------------|---------------|-------------------------------------|----------------------------|---------------|-------------------------------------|---------------------------------|--------------------|
| IDSA 6     | I      | 0             | 12/11/2015  | 1/28/2016  | 48  | $y = 1.837x^2 - 95.77x + 1505.5$    | 0.287                      | 0.029         | $y = -0.0166x^2 + 0.9064x - 5.4642$ | 0.410                      | 0.004         | $y = 0.8771x^2 - 43.328x + 783.88$  | 0.027                           | 0.747              |
| IDSA 6     | I      | 0             | 12/11/2015  | 2/22/2016  | 73  | $y = 2.1851x^2 - 131.88x + 2257.3$  | 0.066                      | 0.486         | $y = -0.0115x^2 + 0.6201x - 2.1474$ | 0.131                      | 0.229         | $y = 1.4938x^2 - 94.721x + 1712.1$  | 0.138                           | 0.211              |
| IDSA 6     | I      | 0             | 12/11/2015  | 2/23/2016  | 74  | $y = 7.255x^2 - 425.64x + 6503.5$   | 0.615                      | 0.000         | $y = -0.0324x^2 + 1.9934x - 24.151$ | 0.617                      | 0.000         | $y = 5.3574x^2 - 308.72x + 4675.2$  | 0.158                           | 0.164              |
| IDSA 6     | II     | NPK           | 4/25/2016   | 6/20/2016  | 56  | $y = 4.8841x^2 - 266.78x + 3898.6$  | 0.685                      | 0.000         | $y = -0.0173x^2 + 0.9398x - 6.8058$ | 0.302                      | 0.056         | $y = 3.8602x^2 - 211.51x + 3088.8$  | 0.621                           | 0.000              |
| IDSA 6     | II     | NPK           | 4/25/2016   | 2/21/2016  | 57  | $y = 1.3078x^2 - 75.369x + 1340.9$  | 0.392                      | 0.024         | $y = 0.0067x^2 - 0.3549x + 10.661$  | 0.032                      | 0.781         | $y = 1.7078x^2 - 96.729x + 1564.5$  | 0.392                           | 0.024              |
| IDSA 6     | II     | NPK           | 4/25/2016   | 2/23/2016  | 59  | $y = 0.7996x^2 - 47.267x + 959.84$  | 0.570                      | 0.002         | $y = 0.0114x^2 - 0.5887x + 13.42$   | 0.215                      | 0.163         | $y = 1.4848x^2 - 82.917x + 1353$    | 0.284                           | 0.081              |
| Azucena    | III    | NPK           | 8/12/2016   | 9/20/2016  | 39  | $y = -0.4398x^2 + 19.319x + 58.172$ | 0.425                      | 0.007         | $y = -0.0084x^2 + 0.444x + 0.3044$  | 0.068                      | 0.552         | $y = -0.9027x^2 + 43.187x - 299.75$ | 0.328                           | 0.034              |
| Azucena    | III    | NPK           | 8/12/2016   | 9/21/2016  | 40  | $y = 2.2556x^2 - 131.44x + 2163.4$  | 0.674                      | 0.000         | $y = 7E-05x^2 - 0.0081x + 6.274$    | 0.007                      | 0.939         | $y = 2.2326x^2 - 130.61x + 2104.8$  | 0.656                           | 0.000              |
| Azucena    | III    | NPK           | 8/12/2016   | 10/11/2016 | 60  | $y = -0.7054x^2 + 35.83x - 167.48$  | 0.251                      | 0.085         | $y = -0.0081x^2 + 0.4363x - 0.0183$ | 0.031                      | 0.766         | $y = -1.1913x^2 + 61.903x - 583.61$ | 0.258                           | 0.079              |
| Azucena    | IV     | Hoagland      | 12/2/2016   | 1/10/2017  | 39  | $y = 5.0772x^2 - 283.29x + 4195.2$  | 0.212                      | 0.117         | $y = -0.0665x^2 + 3.6348x - 43.117$ | 0.185                      | 0.194         | $y = 4.8567x^2 - 274.01x + 4070.2$  | 0.380                           | 0.022              |
| Azucena    | IV     | Hoagland      | 12/2/2016   | 1/11/2017  | 40  | $y = 17.809x^2 - 992.31x + 14058$   | 0.649                      | 0.000         | $y = -0.0276x^2 + 1.5219x - 14.373$ | 0.009                      | 0.919         | $y = 16.144x^2 - 900.58x + 12771$   | 0.428                           | 0.007              |
| Azucena    | IV     | Hoagland      | 12/2/2016   | 1/30/2017  | 59  | $y = 1.3535x^2 - 85.223x + 1607.3$  | 0.514                      | 0.002         | $y = 0.0047x^2 - 0.3036x + 10.68$   | 0.496                      | 0.002         | $y = 1.6199x^2 - 102.86x + 1823.3$  | 0.591                           | 0.000              |
| IRBLTA-2Pi | I      | 0             | 12/11/2015  | 1/28/2016  | 48  | $y = 0.8299x^2 - 47.087x + 931.24$  | 0.426                      | 0.003         | $y = 0.0073x^2 - 0.3265x + 10.158$  | 0.274                      | 0.035         | $y = 1.278x^2 - 67.157x + 1128.7$   | 0.291                           | 0.027              |
| IRBLTA-2Pi | I      | 0             | 12/11/2015  | 2/22/2016  | 73  | $y = -0.9317x^2 + 49.913x - 386.3$  | 0.095                      | 0.351         | $y = 0.0257x^2 - 1.5456x + 29.39$   | 0.121                      | 0.259         | $y = 0.6128x^2 - 43.108x + 963.88$  | 0.214                           | 0.080              |
| IRBLTA-2Pi | I      | 0             | 12/11/2015  | 2/23/2016  | 74  | $y = 6.499x^2 - 381.65x + 5869.4$   | 0.588                      | 0.000         | $y = -0.0172x^2 + 1.1067x - 11.211$ | 0.351                      | 0.011         | $y = 5.4988x^2 - 317.08x + 4805.5$  | 0.245                           | 0.052              |
| IRBLTA-2Pi | II     | NPK           | 4/25/2016   | 6/20/2016  | 56  | $y = 2.0948x^2 - 118.22x + 1929.7$  | 0.742                      | 0.000         | $y = 0.0522x^2 - 2.7535x + 42.424$  | 0.473                      | 0.006         | $y = 5.1865x^2 - 281.44x + 4031.3$  | 0.756                           | 0.000              |
| IRBLTA-2Pi | II     | NPK           | 4/25/2016   | 6/21/2016  | 57  | $y = 0.6361x^2 - 39.823x + 877.82$  | 0.550                      | 0.003         | $y = 0.9244x^2 - 56.101x + 1048.1$  | 0.407                      | 0.897         | $y = 0.9244x^2 - 56.101x + 1048.1$  | 0.407                           | 0.020              |
| IRBLTA-2Pi | II     | NPK           | 4/25/2016   | 6/23/2016  | 59  | $y = 1.3864x^2 - 78.805x + 1376.6$  | 0.420                      | 0.017         | $y = 0.0208x^2 - 1.1182x + 21.08$   | 0.361                      | 0.035         | $y = 2.634x^2 - 146.09x + 2226.4$   | 0.422                           | 0.016              |
| IRBLTA-2Pi | III    | NPK           | 8/12/2016   | 9/20/2016  | 39  | $y = 1.3079x^2 - 75.831x + 1338.1$  | 0.462                      | 0.004         | $y = -0.0339x^2 + 1.8509x - 18.824$ | 0.205                      | 0.142         | $y = -0.839x^2 + 41.098x - 287.89$  | 0.333                           | 0.032              |
| IRBLTA-2Pi | III    | NPK           | 8/12/2016   | 9/21/2016  | 40  | $y = 2.7666x^2 - 162.1x + 2614.5$   | 0.813                      | 0.000         | $y = -0.0116x^2 + 0.6201x - 1.8791$ | 0.129                      | 0.333         | $y = 1.9511x^2 - 118.32x + 1990.8$  | 0.591                           | 0.001              |
| IRBLTA-2Pi | III    | NPK           | 8/12/2016   | 10/11/2016 | 60  | $y = 0.6429x^2 - 38.051x + 839.69$  | 0.199                      | 0.135         | $y = -0.0132x^2 + 0.7225x - 3.6611$ | 0.062                      | 0.564         | $y = -0.1496x^2 + 5.1356x + 204.85$ | 0.135                           | 0.271              |
| IRBLTA-2Pi | IV     | Hoagland      | 12/2/2016   | 1/10/2017  | 39  | $y = 2.0711x^2 - 118.42x + 1942.6$  | 0.217                      | 0.111         | $y = -0.001x^2 + 0.0466x + 6.189$   | 0.003                      | 0.974         | $y = 2.6997x^2 - 152.83x + 2398.1$  | 0.370                           | 0.020              |
| IRBLTA-2Pi | IV     | Hoagland      | 12/2/2016   | 1/11/2017  | 40  | $y = 17.968x^2 - 1005.7x + 14304$   | 0.759                      | 0.000         | $y = -0.0766x^2 + 4.2444x - 51.854$ | 0.130                      | 0.285         | $y = 13.408x^2 - 753.11x + 10803$   | 0.692                           | 0.000              |
| IRBLTA-2Pi | IV     | Hoagland      | 12/2/2016   | 1/30/2017  | 59  | $y = 2.6966x^2 - 157.65x + 2571.1$  | 0.234                      | 0.091         | $y = 0.0015x^2 - 0.1386x + 8.6824$  | 0.428                      | 0.007         | $y = 2.7725x^2 - 165.38x + 2666.7$  | 0.468                           | 0.003              |
| Nerica 4   | I      | 0             | 12/11/2015  | 1/28/2016  | 48  | $y = 1.1558x^2 - 64.09x + 1143.2$   | 0.421                      | 0.003         | $y = -0.0332x^2 + 1.6494x - 13.968$ | 0.335                      | 0.014         | $y = -0.8069x^2 + 33.319x - 93$     | 0.418                           | 0.003              |
| Nerica 4   | I      | 0             | 12/11/2015  | 2/22/2016  | 73  | $y = 2.043x^2 - 119.01x + 2009.4$   | 0.049                      | 0.591         | $y = -0.0025x^2 + 0.1617x + 3.5766$ | 0.020                      | 0.812         | $y = 1.893x^2 - 109.51x + 1809.6$   | 0.038                           | 0.664              |
| Nerica 4   | I      | 0             | 12/11/2015  | 2/23/2016  | 74  | $y = 6.3238x^2 - 368.92x + 5646.7$  | 0.601                      | 0.000         | $y = 0.031x^2 - 1.7186x + 29.885$   | 0.210                      | 0.084         | $y = 6.6782x^2 - 358.42x + 4995.4$  | 0.744                           | 0.000              |
| Nerica 4   | II     | NPK           | 4/25/2016   | 6/20/2016  | 56  | $y = 4.1681x^2 - 228.61x + 3387.6$  | 0.836                      | 0.000         | $y = 0.0421x^2 - 2.1755x + 33.893$  | 0.573                      | 0.001         | $y = 8.2097x^2 - 473.71x + 7046.7$  | 0.522                           | 0.000              |
| Nerica 4   | II     | NPK           | 4/25/2016   | 6/21/2016  | 57  | $y = 0.4318x^2 - 26.793x + 668.94$  | 0.439                      | 0.013         | $y = 0.0007x^2 - 0.0355x + 6.4357$  | 0.003                      | 0.974         | $y = 0.4708x^2 - 28.998x + 639.26$  | 0.390                           | 0.025              |
| Nerica 4   | II     | NPK           | 4/25/2016   | 6/23/2016  | 59  | $y = 1.4953x^2 - 84.492x + 1439.2$  | 0.853                      | 0.000         | $y = -0.0223x^2 + 1.2282x - 10.765$ | 0.263                      | 0.101         | $y = 0.164x^2 - 11.326x + 383.85$   | 0.290                           | 0.077              |
| Nerica 4   | III    | NPK           | 8/12/2016   | 9/20/2016  | 39  | $y = -0.2659x^2 + 11.736x + 128.67$ | 0.113                      | 0.341         | $y = -0.0112x^2 + 0.6055x - 1.933$  | 0.122                      | 0.312         | $y = -0.9349x^2 + 47.73x - 400.23$  | 0.139                           | 0.259              |
| Nerica 4   | III    | NPK           | 8/12/2016   | 9/21/2016  | 40  | $y = 1.8166x^2 - 107.15x + 1814.4$  | 0.494                      | 0.002         | $y = 0.018x^2 - 1.0328x + 20.962$   | 0.175                      | 0.177         | $y = 2.8896x^2 - 168.96x + 2652.1$  | 0.595                           | 0.000              |
| Nerica 4   | III    | NPK           | 8/12/2016   | 10/11/2016 | 60  | $y = 0.8815x^2 - 53.924x + 1087.7$  | 0.677                      | 0.000         | $y = -0.0283x^2 + 1.5187x - 14.378$ | 0.444                      | 0.005         | $y = -0.8112x^2 + 36.857x - 187.07$ | 0.749                           | 0.000              |
| Nerica 4   | IV     | Hoagland      | 12/2/2016   | 1/10/2017  | 39  | $y = 3.9465x^2 - 221.71x + 3354.2$  | 0.186                      | 0.157         | $y = -0.0579x^2 + 3.1643x - 36.669$ | 0.244                      | 0.081         | $y = 0.4833x^2 - 32.684x + 747.19$  | 0.315                           | 0.033              |
| Nerica 4   | IV     | Hoagland      | 12/2/2016   | 1/11/2017  | 40  | $y = 15.103x^2 - 843.37x + 12001$   | 0.615                      | 0.000         | $y = 0.0307x^2 - 1.7309x + 30.784$  | 0.184                      | 0.160         | $y = 17.929x^2 - 1002.5x + 14199$   | 0.678                           | 0.000              |
| Nerica 4   | IV     | Hoagland      | 12/2/2016   | 1/30/2017  | 59  | $y = 2.7098x^2 - 165.01x + 2767.1$  | 0.687                      | 0.000         | $y = 0.009x^2 - 0.5548x + 14.3$     | 0.534                      | 0.001         | $y = 3.2384x^2 - 197.97x + 3204$    | 0.780                           | 0.000              |
| Mean       |        |               |             |            |     |                                     | 0.467                      |               |                                     | 0.238                      |               |                                     | 0.412                           |                    |
| Median     |        |               |             |            |     |                                     | 0.478                      |               |                                     | 0.208                      |               |                                     | 0.391                           |                    |

Table S1.3 Solar radiation dependent variation in Eh, pH and Eh@pH7 for four rice varieties (IDSA 6, Azucena, IRBLTA2Pi, Nerica4). Regression equations over time and strength of the relationship (P and R<sup>2</sup> values) are given for each variety, for each day of measurement in each of four seasons (I to IV). Corresponding fertilization, sowing times, measurement dates and plant ages (DAS) are indicated. Overall mean and median of R<sup>2</sup> values are indicated. Measurements were made on the middle part of the last photosynthetically active leaf of the main tiller.

| Variety    | Season | Fertilization | Sowing Date | Date       | DAS | Regression Eh vs radiation         | R2 Eh vs radiation | P Eh vs radiation | Regression pH vs radiation          | R2 pH vs radiation | P pH vs radiation | Regression Eh(pH7) vs radiation     | R2 Eh(pH7) vs radiation | P Eh(pH7) vs radiation |
|------------|--------|---------------|-------------|------------|-----|------------------------------------|--------------------|-------------------|-------------------------------------|--------------------|-------------------|-------------------------------------|-------------------------|------------------------|
| IDSA 6     | I      | 0             | 12/11/2015  | 1/28/2016  | 48  | $y = 0.0554x^2 - 3.1385x + 297.92$ | 0.622              | 0.000             | $y = -3E-05x^2 + 0.0094x + 6.5044$  | 0.285              | 0.030             | $y = 0.0541x^2 - 2.5988x + 268.91$  | 0.339                   | 0.013                  |
| IDSA 6     | I      | 0             | 12/11/2015  | 2/22/2016  | 73  | $y = 0.0145x^2 - 1.7516x + 307.52$ | 0.617              | 0.000             | $y = -9E-05x^2 + 0.0075x + 6.103$   | 0.124              | 0.250             | $y = 0.0089x^2 - 1.2935x + 253.84$  | 0.557                   | 0.000                  |
| IDSA 6     | I      | 0             | 12/11/2015  | 2/23/2016  | 74  | $y = 0.0028x^2 - 0.658x + 292.99$  | 0.544              | 0.000             | $y = -0.0001x^2 + 0.0154x + 6.0414$ | 0.719              | 0.000             | $y = -0.0051x^2 + 0.2526x + 235.86$ | 0.139                   | 0.208                  |
| IDSA 6     | II     | NPK           | 4/25/2016   | 6/20/2016  | 56  | $y = 0.0231x^2 - 2.1135x + 296.85$ | 0.703              | 0.000             | $y = -0.0001x^2 + 0.0083x + 5.7984$ | 0.378              | 0.022             | $y = 0.0161x^2 - 1.6528x + 225.91$  | 0.657                   | 0.000                  |
| IDSA 6     | II     | NPK           | 4/25/2016   | 2/21/2016  | 57  | $y = 0.0116x^2 - 1.0876x + 277.44$ | 0.321              | 0.055             | $y = -0.0001x^2 + 0.0077x + 6.0016$ | 0.305              | 0.065             | $y = 0.0052x^2 - 0.6609x + 218.5$   | 0.289                   | 0.077                  |
| IDSA 6     | II     | NPK           | 4/25/2016   | 2/23/2016  | 59  | $y = 0.0057x^2 - 0.8324x + 288.88$ | 0.629              | 0.001             | $y = -3E-05x^2 + 0.0037x + 5.8482$  | 0.096              | 0.467             | $y = 0.0043x^2 - 0.6478x + 221.02$  | 0.300                   | 0.069                  |
| Azucena    | III    | NPK           | 8/12/2016   | 9/20/2016  | 39  | $y = 0.0042x^2 - 0.7209x + 271.29$ | 0.520              | 0.001             | $y = 4E-05x^2 - 0.0053x + 6.1962$   | 0.223              | 0.117             | $y = 0.0062x^2 - 1.0531x + 224.07$  | 0.516                   | 0.002                  |
| Azucena    | III    | NPK           | 8/12/2016   | 9/21/2016  | 40  | $y = 0.0108x^2 - 1.0544x + 273.3$  | 0.421              | 0.007             | $y = -2E-05x^2 + 0.0007x + 6.1144$  | 0.082              | 0.482             | $y = 0.0105x^2 - 1.0867x + 221.12$  | 0.438                   | 0.007                  |
| Azucena    | III    | NPK           | 8/12/2016   | 10/11/2016 | 60  | $y = 0.0148x^2 - 0.8825x + 290.46$ | 0.227              | 0.112             | $y = 5E-05x^2 - 0.0016x + 5.8598$   | 0.012              | 0.902             | $y = 0.0187x^2 - 1.0446x + 223.13$  | 0.200                   | 0.150                  |
| Azucena    | IV     | Hoagland      | 12/2/2016   | 1/10/2017  | 39  | $y = 0.0193x^2 - 1.3272x + 266.63$ | 0.380              | 0.014             | $y = -0.0001x^2 + 0.0059x + 6.3716$ | 0.033              | 0.764             | $y = 0.0093x^2 - 0.9406x + 229.35$  | 0.353                   | 0.031                  |
| Azucena    | IV     | Hoagland      | 12/2/2016   | 1/11/2017  | 40  | $y = 0.0158x^2 - 1.3132x + 280.66$ | 0.702              | 0.000             | $y = -5E-05x^2 + 0.0009x + 6.5649$  | 0.015              | 0.873             | $y = 0.0127x^2 - 1.2637x + 254.8$   | 0.512                   | 0.002                  |
| Azucena    | IV     | Hoagland      | 12/2/2016   | 1/30/2017  | 59  | $y = 0.0191x^2 - 1.5737x + 295.59$ | 0.739              | 0.000             | $y = 0.0001x^2 - 0.0097x + 5.9108$  | 0.708              | 0.000             | $y = 0.0279x^2 - 2.1856x + 230.69$  | 0.830                   | 0.000                  |
| IRBLTA-2Pi | I      | 0             | 12/11/2015  | 1/28/2016  | 48  | $y = 0.0525x^2 - 3.0861x + 309.61$ | 0.714              | 0.000             | $y = -6E-05x^2 + 0.0094x + 6.4286$  | 0.435              | 0.002             | $y = 0.0491x^2 - 2.5533x + 276.14$  | 0.525                   | 0.000                  |
| IRBLTA-2Pi | I      | 0             | 12/11/2015  | 2/22/2016  | 73  | $y = 0.0109x^2 - 1.2108x + 296.8$  | 0.341              | 0.013             | $y = -6E-05x^2 + 0.0069x + 6.1186$  | 0.153              | 0.174             | $y = 0.0069x^2 - 0.7866x + 243.94$  | 0.191                   | 0.108                  |
| IRBLTA-2Pi | I      | 0             | 12/11/2015  | 2/23/2016  | 74  | $y = 0.0118x^2 - 1.3414x + 302.65$ | 0.620              | 0.000             | $y = -9E-05x^2 + 0.0106x + 6.1525$  | 0.308              | 0.021             | $y = 0.0065x^2 - 0.7149x + 252.13$  | 0.248                   | 0.050                  |
| IRBLTA-2Pi | II     | NPK           | 4/25/2016   | 6/20/2016  | 56  | $y = 0.0341x^2 - 2.0506x + 292.88$ | 0.602              | 0.001             | $y = 0.0002x^2 - 0.0105x + 6.3368$  | 0.247              | 0.104             | $y = 0.0451x^2 - 2.6961x + 253.73$  | 0.647                   | 0.000                  |
| IRBLTA-2Pi | II     | NPK           | 4/25/2016   | 6/21/2016  | 57  | $y = 0.0118x^2 - 1.2819x + 286.19$ | 0.578              | 0.002             | $y = 2E-05x^2 - 0.002x + 6.0622$    | 0.011              | 0.921             | $y = 0.0133x^2 - 1.4309x + 230.86$  | 0.422                   | 0.016                  |
| IRBLTA-2Pi | II     | NPK           | 4/25/2016   | 6/23/2016  | 59  | $y = 0.0096x^2 - 1.1939x + 288.15$ | 0.525              | 0.004             | $y = 3E-05x^2 - 0.0023x + 6.1964$   | 0.160              | 0.269             | $y = 0.0116x^2 - 1.3605x + 240.83$  | 0.437                   | 0.013                  |
| IRBLTA-2Pi | III    | NPK           | 8/12/2016   | 9/20/2016  | 39  | $y = 0.0095x^2 - 1.1619x + 267.03$ | 0.357              | 0.019             | $y = -0.0002x^2 + 0.0156x + 6.1105$ | 0.253              | 0.084             | $y = -0.0005x^2 - 0.2236x + 214.3$  | 0.283                   | 0.059                  |
| IRBLTA-2Pi | III    | NPK           | 8/12/2016   | 9/21/2016  | 40  | $y = 0.0172x^2 - 1.6937x + 279.22$ | 0.784              | 0.000             | $y = 0.0205x^2 - 1.9966x + 243.07$  | 0.566              | 0.674             | $y = 0.0205x^2 - 1.9966x + 243.07$  | 0.566                   | 0.001                  |
| IRBLTA-2Pi | III    | NPK           | 8/12/2016   | 10/11/2016 | 60  | $y = 0.0027x^2 - 0.4662x + 288.47$ | 0.152              | 0.228             | $y = -2E-05x^2 + 0.0006x + 6.1731$  | 0.002              | 0.980             | $y = 0.0022x^2 - 0.4694x + 239.59$  | 0.119                   | 0.320                  |
| IRBLTA-2Pi | IV     | Hoagland      | 12/2/2016   | 1/10/2017  | 39  | $y = 0.0302x^2 - 1.799x + 271.9$   | 0.577              | 0.000             | $y = -0.0003x^2 + 0.0149x + 6.6593$ | 0.330              | 0.033             | $y = 0.0123x^2 - 0.8827x + 251.5$   | 0.389                   | 0.015                  |
| IRBLTA-2Pi | IV     | Hoagland      | 12/2/2016   | 1/11/2017  | 40  | $y = 0.0226x^2 - 1.8196x + 284.14$ | 0.574              | 0.000             | $y = -0.0002x^2 + 0.0068x + 6.7725$ | 0.124              | 0.305             | $y = 0.0126x^2 - 1.4222x + 270.63$  | 0.528                   | 0.001                  |
| IRBLTA-2Pi | IV     | Hoagland      | 12/2/2016   | 1/30/2017  | 59  | $y = 0.0132x^2 - 0.9876x + 282.39$ | 0.365              | 0.017             | $y = 1E-06x^2 - 0.003x + 6.0025$    | 0.285              | 0.049             | $y = 0.0135x^2 - 1.1945x + 222.97$  | 0.531                   | 0.001                  |
| Nerica 4   | I      | 0             | 12/11/2015  | 1/28/2016  | 48  | $y = 0.0659x^2 - 3.5694x + 303.4$  | 0.626              | 0.000             | $y = 6E-05x^2 + 9E-05x + 6.3453$    | 0.044              | 0.625             | $y = 0.0698x^2 - 3.5997x + 265.14$  | 0.451                   | 0.002                  |
| Nerica 4   | I      | 0             | 12/11/2015  | 2/22/2016  | 73  | $y = 0.014x^2 - 1.4338x + 300.38$  | 0.417              | 0.003             | $y = -1E-05x^2 + 0.0012x + 6.1354$  | 0.003              | 0.967             | $y = 0.0131x^2 - 1.3572x + 248.64$  | 0.336                   | 0.014                  |
| Nerica 4   | I      | 0             | 12/11/2015  | 2/23/2016  | 74  | $y = 0.01x^2 - 1.1668x + 296.66$   | 0.700              | 0.000             | $y = -3E-05x^2 + 0.003x + 6.0542$   | 0.050              | 0.583             | $y = 0.0083x^2 - 1x + 240.32$       | 0.552                   | 0.000                  |
| Nerica 4   | II     | NPK           | 4/25/2016   | 6/20/2016  | 56  | $y = 0.0321x^2 - 2.3568x + 294.59$ | 0.812              | 0.000             | $y = -8E-05x^2 + 0.0049x + 5.8943$  | 0.067              | 0.574             | $y = 8.2097x^2 - 473.71x + 7046.7$  | 0.522                   | 0.000                  |
| Nerica 4   | II     | NPK           | 4/25/2016   | 6/21/2016  | 57  | $y = 0.0076x^2 - 0.8093x + 272.03$ | 0.440              | 0.013             | $y = -7E-07x^2 - 5E-05x + 5.9895$   | 0.002              | 0.988             | $y = 0.0078x^2 - 0.8471x + 212.38$  | 0.422                   | 0.016                  |
| Nerica 4   | II     | NPK           | 4/25/2016   | 6/23/2016  | 59  | $y = 0.0055x^2 - 0.7754x + 273.68$ | 0.673              | 0.000             | $y = -6E-05x^2 + 0.0073x + 5.8662$  | 0.170              | 0.246             | $y = 0.0021x^2 - 0.3785x + 206.95$  | 0.257                   | 0.108                  |
| Nerica 4   | III    | NPK           | 8/12/2016   | 9/20/2016  | 39  | $y = 0.0087x^2 - 1.0765x + 266.5$  | 0.416              | 0.008             | $y = -2E-05x^2 + 0.0009x + 6.2094$  | 0.171              | 0.185             | $y = 0.0074x^2 - 1.032x + 219.74$   | 0.491                   | 0.002                  |
| Nerica 4   | III    | NPK           | 8/12/2016   | 9/21/2016  | 40  | $y = 0.0059x^2 - 0.8587x + 259.75$ | 0.476              | 0.003             | $y = 3E-05x^2 - 0.0039x + 6.2604$   | 0.077              | 0.485             | $y = 0.0078x^2 - 1.1135x + 215.87$  | 0.493                   | 0.002                  |
| Nerica 4   | III    | NPK           | 8/12/2016   | 10/11/2016 | 60  | $y = 0.0282x^2 - 1.9562x + 295.47$ | 0.737              | 0.000             | $y = -2E-05x^2 - 0.001x + 5.9461$   | 0.056              | 0.594             | $y = 0.0278x^2 - 2.0745x + 233.24$  | 0.664                   | 0.000                  |
| Nerica 4   | IV     | Hoagland      | 12/2/2016   | 1/10/2017  | 39  | $y = 0.0225x^2 - 1.3728x + 284.2$  | 0.632              | 0.011             | $y = -0.0026x^2 + 0.0558x + 6.2402$ | 0.543              | 0.420             | $y = 0.0708x^2 - 3.0417x + 239.06$  | 0.504                   | 0.030                  |
| Nerica 4   | IV     | Hoagland      | 12/2/2016   | 1/11/2017  | 40  | $y = 0.023x^2 - 1.5112x + 268.61$  | 0.507              | 0.002             | $y = 7E-06x^2 - 0.004x + 6.4865$    | 0.250              | 0.075             | $y = 0.024x^2 - 1.761x + 237.59$    | 0.536                   | 0.001                  |
| Nerica 4   | IV     | Hoagland      | 12/2/2016   | 1/30/2017  | 59  | $y = 0.0181x^2 - 1.6745x + 290.43$ | 0.823              | 0.000             | $y = 0.0001x^2 - 0.0078x + 5.8651$  | 0.446              | 0.005             | $y = 0.0247x^2 - 2.1666x + 222.82$  | 0.859                   | 0.000                  |
| Mean       |        |               |             |            |     |                                    | 0.552              |                   |                                     | 0.215              |                   |                                     | 0.447                   |                        |
| Median     |        |               |             |            |     |                                    | 0.577              |                   |                                     | 0.165              |                   |                                     | 0.471                   |                        |

Table S2. Means and pairwise comparisons of Eh, pH and Eh@pH7 for three leaf parts (Base, Middle, Tip) in three growing seasons (II to IV) for increasing plant age (DAS from 40 to 80) and two water managements (Upland = aerobic; Lowland = anaerobic).

Rice plants of variety Nerica4 (seasons II and III) and IR64 (season IV) were sown in 25 April 2016, 12 August 2016 and 02 December 2016 in season I to IV, respectively, fertilized with NPK in seasons II to III and Hoagland's solution in season IV. Measurements were made on the last photosynthetically active leaf of the main tiller in seasons II and III, and on the last photosynthetically active leaf (leaf 2) and the leaf emerged two leaves earlier (leaf 4) for the main tiller, tiller 1 and tiller 2 in season IV. When data were collected on different leaves, pooled data are also analyzed (leaf 2 and leaf 4 in season 4). Mean temperature and solar radiation intensity at the day of measurement are indicated. Values followed by different letters indicate significant difference between leaf positions at 95% confidence interval (REGW-Q test).

| Season II: Nerica 4 |                  |                  |       |         |         |       |         |         |          |             |       |                     |                           |         |
|---------------------|------------------|------------------|-------|---------|---------|-------|---------|---------|----------|-------------|-------|---------------------|---------------------------|---------|
|                     |                  |                  |       | Eh (mV) |         |       | pH      |         |          | Eh@pH7 (mV) |       | Temperature<br>(°C) | Solar Radiation<br>(W/m2) |         |
| Leaf part           | DAS              | Water management | N     | Mean    | Pr>Diff | Mean  | Pr>Diff | Mean    | Pr>Diff  |             |       |                     |                           |         |
| Base                | 61               | Upland           | 4     | 304.3   | a       | 0.264 | 5.89    | b       | < 0.0001 | 239.0       | a     | 0.938               | 30.57 a                   | 62.11 a |
|                     |                  | Lowland          | 4     | 289.9   | a       |       | 6.15    | a       |          | 238.0       | a     |                     | 30.75 a                   | 58.45 a |
|                     | 80               | Upland           | 3     | 307.9   | a       | 0.598 | 5.50    | a       | 0.363    | 217.9       | a     | 0.438               | 30.60 a                   | 47.83 a |
|                     |                  | Lowland          | 3     | 317.5   | a       |       | 5.57    | a       |          | 231.7       | a     |                     | 30.73 a                   | 47.71 a |
| Middle              | 61               | Upland           | 4     | 263.2   | a       | 0.411 | 6.03    | a       | <0.0001  | 205.4       | a     | 0.338               | 30.80 a                   | 62.11 a |
|                     |                  | Lowland          | 4     | 272.6   | a       |       | 5.67    | b       |          | 192.5       | a     |                     | 30.55 a                   | 58.45 a |
|                     | 80               | Upland           | 3     | 285.7   | a       | 0.112 | 5.50    | a       | 0.198    | 195.5       | a     | 0.556               | 30.80 a                   | 47.83 a |
|                     |                  | Lowland          | 3     | 297.2   | a       |       | 5.38    | a       |          | 199.8       | a     |                     | 30.67 a                   | 47.71 a |
| Tip                 | 61               | Upland           | 4     | 274.1   | a       | 0.013 | 5.62    | b       | 0.000    | 191.7       | a     | 0.803               | 30.80 a                   | 62.11 a |
|                     |                  | Lowland          | 4     | 245.7   | b       |       | 6.05    | a       |          | 188.8       | a     |                     | 30.75 a                   | 58.45 a |
|                     | 80               | Upland           | 3     | 278.8   | a       | 0.914 | 5.34    | b       | 0.043    | 178.8       | a     | 0.133               | 30.80 a                   | 47.83 a |
|                     |                  | Lowland          | 3     | 279.5   | a       |       | 5.54    | a       |          | 191.7       | a     |                     | 30.67 a                   | 47.71 a |
| Leaf                | 61               | Upland           | 12    | 279.9   | a       | 0.268 | 5.96    | a       | 0.220    | 210.9       | a     | 0.712               | 30.65 a                   | 62.11 a |
|                     |                  | Lowland          | 12    | 269.4   | a       |       | 5.85    | a       |          | 206.8       | a     |                     | 30.68 a                   | 58.45 a |
|                     | 80               | Upland           | 3     | 290.8   | a       | 0.426 | 5.45    | a       | 0.369    | 197.4       | a     | 0.314               | 30.69 a                   | 47.83 a |
|                     |                  | Lowland          | 9     | 298.1   | a       |       | 5.50    | a       |          | 207.7       | a     |                     | 30.73 a                   | 47.71 a |
| Season II: Nerica 4 |                  |                  |       |         |         |       |         |         |          |             |       |                     |                           |         |
|                     |                  |                  |       | Eh (mV) |         |       | pH      |         |          | Eh@pH7 (mV) |       | Temperature<br>(°C) | Solar Radiation<br>(W/m2) |         |
| Leaf part           | Water management | DAS              | N     | Mean    | Pr>Diff | Mean  | Pr>Diff | Mean    | Pr>Diff  |             |       |                     |                           |         |
| Base                | Upland           | 61               | 4     | 304.3   | a       | 0.775 | 5.89    | a       | 0.001    | 238.0       | a     | 0.174               | 30.57 a                   | 62.11 a |
|                     |                  | 80               | 3     | 307.9   | a       |       | 5.50    | b       |          | 217.9       | a     |                     | 30.60 a                   | 47.83 b |
|                     | Lowland          | 61               | 4     | 290.0   | a       | 0.14  | 6.15    | a       | < 0.0001 | 239.0       | a     | 0.643               | 30.75 a                   | 58.48 a |
|                     |                  | 80               | 3     | 317.5   | a       |       | 5.57    | b       |          | 231.7       | a     |                     | 30.73 a                   | 47.71 a |
| Middle              | Upland           | 61               | 4     | 263.2   | a       | 0.072 | 6.04    | a       | 0.000    | 205.4       | a     | 0.439               | 30.80 a                   | 62.11 a |
|                     |                  | 80               | 3     | 285.5   | a       |       | 5.50    | b       |          | 195.5       | a     |                     | 30.80 a                   | 47.83 b |
|                     | Lowland          | 61               | 4     | 272.6   | b       | 0.042 | 5.67    | a       | 0.006    | 192.5       | a     | 0.515               | 30.55 a                   | 58.48 a |
|                     |                  | 80               | 3     | 297.2   | a       |       | 5.38    | b       |          | 199.8       | a     |                     | 30.67 a                   | 47.71 a |
| Tip                 | Upland           | 61               | 4     | 274.1   | a       | 0.519 | 5.62    | a       | 0.005    | 191.7       | a     | 0.155               | 30.80 a                   | 62.11 a |
|                     |                  | 80               | 3     | 278.8   | a       |       | 5.34    | b       |          | 178.8       | a     |                     | 30.67 a                   | 47.83 b |
|                     | Lowland          | 61               | 4     | 245.7   | b       | 0.016 | 6.05    | a       | 0.000    | 188.8       | a     | 0.821               | 30.75 a                   | 58.48 a |
|                     |                  | 80               | 3     | 279.7   | a       |       | 5.54    | b       |          | 191.7       | a     |                     | 30.80 a                   | 47.71 a |
| Leaf                | Upland           | 61               | 4     | 290.0   | a       | 0.14  | 6.15    | a       | < 0.0001 | 239.0       | a     | 0.643               | 30.75 a                   | 58.48 a |
|                     |                  | 80               | 3     | 317.5   | a       |       | 5.57    | b       |          | 231.7       | a     |                     | 30.73 a                   | 47.71 a |
|                     | Upland           | 61               | 4     | 263.2   | a       | 0.072 | 6.04    | a       | 0.000    | 205.4       | a     | 0.439               | 30.80 a                   | 62.11 a |
|                     |                  | 80               | 3     | 285.5   | a       |       | 5.50    | b       |          | 195.5       | a     |                     | 30.80 a                   | 47.83 b |
| Middle              | Upland           | 61               | 4     | 272.6   | b       | 0.042 | 5.67    | a       | 0.006    | 192.5       | a     | 0.515               | 30.55 a                   | 58.48 a |
|                     |                  | 80               | 3     | 297.2   | a       |       | 5.38    | b       |          | 199.8       | a     |                     | 30.67 a                   | 47.71 a |
|                     | Upland           | 61               | 4     | 274.1   | a       | 0.519 | 5.62    | a       | 0.005    | 191.7       | a     | 0.155               | 30.80 a                   | 62.11 a |
|                     |                  | 80               | 3     | 278.8   | a       |       | 5.34    | b       |          | 178.8       | a     |                     | 30.67 a                   | 47.83 b |
| Tip                 | Upland           | 61               | 4     | 245.7   | b       | 0.016 | 6.05    | a       | 0.000    | 188.8       | a     | 0.821               | 30.75 a                   | 58.48 a |
|                     |                  | 80               | 3     | 279.7   | a       |       | 5.54    | b       |          | 191.7       | a     |                     | 30.80 a                   | 47.71 a |
|                     | Lowland          | 61               | 4     | 290.0   | a       | 0.14  | 6.15    | a       | < 0.0001 | 239.0       | a     | 0.643               | 30.75 a                   | 58.48 a |
|                     |                  | 80               | 3     | 317.5   | a       |       | 5.57    | b       |          | 231.7       | a     |                     | 30.73 a                   | 47.71 a |
| Middle              | Upland           | 61               | 4     | 263.2   | a       | 0.072 | 6.04    | a       | 0.000    | 205.4       | a     | 0.439               | 30.80 a                   | 62.11 a |
|                     |                  | 80               | 3     | 285.5   | a       |       | 5.50    | b       |          | 195.5       | a     |                     | 30.80 a                   | 47.83 b |
|                     | Upland           | 61               | 4     | 272.6   | b       | 0.042 | 5.67    | a       | 0.006    | 192.5       | a     | 0.515               | 30.55 a                   | 58.48 a |
|                     |                  | 80               | 3     | 297.2   | a       |       | 5.38    | b       |          | 199.8       | a     |                     | 30.67 a                   | 47.71 a |
| Leaf                | Upland           | 61               | 4     | 274.1   | a       | 0.519 | 5.62    | a       | 0.005    | 191.7       | a     | 0.155               | 30.80 a                   | 62.11 a |
|                     |                  | 80               | 3     | 278.8   | a       |       | 5.34    | b       |          | 178.8       | a     |                     | 30.67 a                   | 47.83 b |
|                     | Upland           | 61               | 12    | 279.9   | a       | 0.226 | 5.85    | a       | < 0.0001 | 210.9       | a     | 0.200               | 30.65 a                   | 62.11 a |
|                     |                  | 80               | 9     | 290.8   | a       |       | 5.48    | b       |          | 197.4       | a     |                     | 30.69 a                   | 47.83 b |
| Lowland             | 61               | 12               | 269.4 | b       | 0.01    | 5.96  | a       | <0.0001 | 206.8    | a           | 0.934 | 30.68 a             | 58.48 a                   |         |
|                     | 80               | 9                | 298.1 | a       |         | 5.50  | b       |         | 207.7    | a           |       | 30.73 a             | 47.71 a                   |         |
| Season IV: IR 64    |                  |                  |       |         |         |       |         |         |          |             |       |                     |                           |         |
|                     |                  |                  |       | Eh (mV) |         |       | pH      |         |          | Eh@pH7 (mV) |       | Temperature<br>(°C) | Solar Radiation<br>(W/m2) |         |
| Leaf part           | DAS              | Leaf             | N     | Mean    | Pr>Diff | Mean  | Pr>Diff | Mean    | Pr>Diff  |             |       |                     |                           |         |
| Base                | 55               | L2               | 3     | 237.4   | a       | 0.581 | 6.53    | a       | 0.006    | 209.0       | a     | 0.441               | 31.77 a                   | 41.78 b |
|                     |                  | L4               | 3     | 231.4   | a       |       | 6.24    | b       |          | 185.4       | b     |                     | 32.20 a                   | 63.39 a |
| Middle              | 55               | L2               | 3     | 216.1   | a       | 0.071 | 6.37    | a       | 0.029    | 178.2       | a     | 0.622               | 32.10 a                   | 41.78 b |
|                     |                  | L4               | 3     | 205.3   | a       |       | 6.09    | b       |          | 150.2       | b     |                     | 32.27 a                   | 63.39 a |
| Tip                 | 55               | L2               | 3     | 191.5   | a       | 0.441 | 6.19    | a       | 0.155    | 142.6       | a     | 0.155               | 32.03 a                   | 41.78 b |
|                     |                  | L4               | 3     | 177.1   | a       |       | 5.98    | b       |          | 115.4       | a     |                     | 32.17 a                   | 63.39 a |
| Leaf                | 55               | L2               | 9     | 215.0   | a       | 0.135 | 6.36    | a       | < 0.0001 | 176.6       | a     | 0.001               | 32.21 a                   | 41.78 b |
|                     |                  | L4               | 9     | 204.6   | a       |       | 6.10    | b       |          | 150.3       | b     |                     | 31.97 a                   | 63.39 a |

Table S3.1. Intra-plant spatial variability of leaf Eh, pH and Eh@pH7 in season II on 40-41 DAS-old plants. Means over 4 plants, standard deviation and rankings based on pairwise comparisons depending on leaf position (Leaf 2 to 10) on five tillers (main and 1 to 4). Across tillers, leaves of the same ages are pooled into 5 age classes (1 to 5 from youngest to oldest), with corresponding mean, standard deviation and ranking. Plants of the rice variety Nerica4 were sown in 17<sup>th</sup> August 2016, then grown in aerobic conditions, fertilized with NPK. Measurements were made on the middle part of the leaf. Mean temperature was 29.2°C and mean solar radiation intensity was 46.2W/m<sup>2</sup>. Values followed by different letters indicate significant difference between leaf positions at 95% confidence interval (REGW-Q test). Leaf and tiller numbering according to Katayama (1951).

| Season II 17 August 2016 40-41 DAS |             |                    |              | n=4      |             |                    |              | Nerica 4 Upland NPK |             |                    |              | Mean temp: 29.2°C |             |                    |              | Mean solar radiation : 46.2W/m <sup>2</sup> |             |                    |              |                |             |                    |              |
|------------------------------------|-------------|--------------------|--------------|----------|-------------|--------------------|--------------|---------------------|-------------|--------------------|--------------|-------------------|-------------|--------------------|--------------|---------------------------------------------|-------------|--------------------|--------------|----------------|-------------|--------------------|--------------|
| Main tiller                        | Eh (mV)     | Standard deviation | Ranking (5%) | Tiller 1 | Eh (mV)     | Standard deviation | Ranking (5%) | Tiller 2            | Eh (mV)     | Standard deviation | Ranking (5%) | Tiller 3          | Eh (mV)     | Standard deviation | Ranking (5%) | Tiller 4                                    | Eh (mV)     | Standard deviation | Ranking (5%) | Leaf age class | Eh (mV)     | Standard deviation | Ranking (5%) |
| Leaf 11                            |             |                    |              | Leaf 8   |             |                    |              | Leaf 7              |             |                    |              | Leaf 6            |             |                    |              | Leaf 5                                      |             |                    |              | Youngest       |             |                    |              |
| Leaf 10                            | 239.9       | 6.8                | ab           | Leaf 7   | 240.7       | 13.8               | ab           | Leaf 6              | 253.5       | 1.1                | ab           | Leaf 5            | 260.1       | 19.0               | ab           | Leaf 4                                      | 252.1       | 2.5                | ab           | 1              | 249.2       | 11.3               | ab           |
| Leaf 9                             | 239.7       | 3.2                | ab           | Leaf 6   | 231.2       | 7.5                | b            | Leaf 5              | 258.6       | 13.1               | ab           | Leaf 4            | 250.2       | 20.6               | ab           | Leaf 3                                      | 241.3       | 4.8                | ab           | 2              | 244.2       | 15.1               | b            |
| Leaf 8                             | 242.3       | 10.7               | ab           | Leaf 5   | 247.1       | 14.1               | ab           | Leaf 4              | 256.0       | 6.3                | ab           | Leaf 3            | 257.8       | 24.3               | ab           | Leaf 2                                      | 267.0       | 2.5                | a            | 3              | 254.1       | 14.2               | ab           |
| Leaf 7                             | 235.2       | 12.7               | ab           | Leaf 4   | 261.8       | 10.1               | ab           | Leaf 3              | 257.2       | 14.8               | ab           | Leaf 2            | 260.7       | 13.7               | ab           | Leaf 1                                      |             |                    |              | 4              | 253.7       | 17.1               | ab           |
| Leaf 6                             | 264.9       | 12.0               | ab           | Leaf 3   | 245.4       | 6.1                | ab           | Leaf 2              | 263.8       | 13.7               | ab           | Leaf 1            |             |                    |              |                                             |             |                    |              | 5              | 259.8       | 14.3               | a            |
| Leaf 5                             |             |                    |              | Leaf 2   |             |                    |              | Leaf 1              |             |                    |              |                   |             |                    |              |                                             |             |                    |              | Oldest         |             |                    |              |
| Main tiller                        | pH          | Standard deviation | Ranking (5%) | Tiller 1 | pH          | Standard deviation | Ranking (5%) | Tiller 2            | pH          | Standard deviation | Ranking (5%) | Tiller 3          | pH          | Standard deviation | Ranking (5%) | Tiller 4                                    | pH          | Standard deviation | Ranking (5%) | Leaf age class | pH          | Standard deviation | Ranking (5%) |
| Leaf 11                            |             |                    |              | Leaf 8   |             |                    |              | Leaf 7              |             |                    |              | Leaf 6            |             |                    |              | Leaf 5                                      |             |                    |              | Youngest       |             |                    |              |
| Leaf 10                            | 6.30        | 0.03               | a            | Leaf 7   | 6.30        | 0.07               | a            | Leaf 6              | 6.29        | 0.10               | a            | Leaf 5            | 6.29        | 0.02               | a            | Leaf 4                                      | 6.32        | 0.13               | a            | 1              | 6.30        | 0.05               | a            |
| Leaf 9                             | 6.15        | 0.12               | ab           | Leaf 6   | 6.07        | 0.05               | abc          | Leaf 5              | 6.08        | 0.13               | abc          | Leaf 4            | 6.18        | 0.14               | ab           | Leaf 3                                      | 6.18        | 0.16               | ab           | 2              | 6.13        | 0.12               | b            |
| Leaf 8                             | 5.96        | 0.09               | bcd          | Leaf 5   | 5.97        | 0.04               | bcd          | Leaf 4              | 5.99        | 0.12               | bcd          | Leaf 3            | 5.99        | 0.12               | bcd          | Leaf 2                                      | 6.02        | 0.05               | bcd          | 3              | 5.98        | 0.09               | c            |
| Leaf 7                             | 5.97        | 0.02               | bcd          | Leaf 4   | 5.87        | 0.08               | cd           | Leaf 3              | 5.92        | 0.05               | bcd          | Leaf 2            | 5.85        | 0.12               | cd           | Leaf 1                                      |             |                    |              | 4              | 5.91        | 0.08               | d            |
| Leaf 6                             | 5.77        | 0.15               | d            | Leaf 3   | 5.83        | 0.06               | cd           | Leaf 2              | 5.92        | 0.01               | bcd          | Leaf 1            |             |                    |              |                                             |             |                    |              | 5              | 5.82        | 0.12               | e            |
| Leaf 5                             |             |                    |              | Leaf 2   |             |                    |              | Leaf 1              |             |                    |              |                   |             |                    |              |                                             |             |                    |              | Oldest         |             |                    |              |
| Main tiller                        | Eh@pH7 (mV) | Standard deviation | Ranking (5%) | Tiller 1 | Eh@pH7 (mV) | Standard deviation | Ranking (5%) | Tiller 2            | Eh@pH7 (mV) | Standard deviation | Ranking (5%) | Tiller 3          | Eh@pH7 (mV) | Standard deviation | Ranking (5%) | Tiller 4                                    | Eh@pH7 (mV) | Standard deviation | Ranking (5%) | Leaf age class | Eh@pH7 (mV) | Standard deviation | Ranking (5%) |
| Leaf 11                            |             |                    |              | Leaf 8   |             |                    |              | Leaf 7              |             |                    |              | Leaf 6            |             |                    |              | Leaf 5                                      |             |                    |              | Youngest       |             |                    |              |
| Leaf 10                            | 197.9       | 7.4                | ab           | Leaf 7   | 198.7       | 12.3               | ab           | Leaf 6              | 211.0       | 5.9                | ab           | Leaf 5            | 217.6       | 12.8               | a            | Leaf 4                                      | 211.4       | 5.2                | ab           | 1              | 207.3       | 11.2               | a            |
| Leaf 9                             | 188.6       | 10.4               | ab           | Leaf 6   | 175.9       | 8.4                | ab           | Leaf 5              | 203.6       | 16.0               | ab           | Leaf 4            | 200.9       | 32.2               | ab           | Leaf 3                                      | 192.0       | 14.1               | ab           | 2              | 192.8       | 19.1               | b            |
| Leaf 8                             | 180.3       | 11.3               | ab           | Leaf 5   | 185.6       | 12.2               | ab           | Leaf 4              | 195.8       | 6.9                | ab           | Leaf 3            | 197.2       | 23.4               | ab           | Leaf 2                                      | 209.1       | 9.5                | ab           | 3              | 192.2       | 15.9               | b            |
| Leaf 7                             | 173.6       | 13.1               | b            | Leaf 4   | 194.0       | 10.4               | ab           | Leaf 3              | 192.8       | 12.8               | ab           | Leaf 2            | 184.5       | 11.3               | ab           | Leaf 1                                      |             |                    |              | 4              | 189.2       | 13.7               | b            |
| Leaf 6                             | 191.3       | 3.7                | ab           | Leaf 3   | 175.1       | 12.4               | ab           | Leaf 2              | 199.2       | 12.9               | ab           | Leaf 1            |             |                    |              |                                             |             |                    |              | 5              | 186.3       | 11.8               | b            |
| Leaf 5                             |             |                    |              | Leaf 2   |             |                    |              | Leaf 1              |             |                    |              |                   |             |                    |              |                                             |             |                    |              | Oldest         |             |                    |              |



Table S3.2. Intra-plant spatial variability of leaf Eh, pH and Eh@pH7 in season II on 61-64 DAS-old plants. Means over 4 plants, standard deviation and rankings based on pairwise comparisons depending on leaf position (Leaf 3 to 12) on five tillers (main and 1 to 4). Across tillers, leaves of the same ages are pooled into 6 age classes (1 to 6 from youngest to oldest), with corresponding mean, standard deviation and ranking. Plants of the rice variety Nerica4 were sown in 17 August 2016, then grown in aerobic conditions, fertilized with NPK. Measurements were made on the middle part of the leaf. Mean temperature was 30.2°C and mean solar radiation intensity was 49.9W/m<sup>2</sup>. Values followed by different letters indicate significant difference between leaf positions at 95% confidence interval (REGW-Q test). Leaf and tiller numbering according to Katayama (1951).

| Season I 17 August 2016 |             |                    |              | 61-64 DAS |             |                    |              | n=4      |             |                    |              | Nerica 4 Upland NPK |             |                    |              | Mean temp: 30.2°C |             |                    |              | Mean solar radiation : 49.92W/m <sup>2</sup> |             |                    |              |
|-------------------------|-------------|--------------------|--------------|-----------|-------------|--------------------|--------------|----------|-------------|--------------------|--------------|---------------------|-------------|--------------------|--------------|-------------------|-------------|--------------------|--------------|----------------------------------------------|-------------|--------------------|--------------|
| Main tiller             | Eh (mV)     | Standard deviation | Ranking (5%) | Tiller 1  | Eh (mV)     | Standard deviation | Ranking (5%) | Tiller 2 | Eh (mV)     | Standard deviation | Ranking (5%) | Tiller 3            | Eh (mV)     | Standard deviation | Ranking (5%) | Tiller 4          | Eh (mV)     | Standard deviation | Ranking (5%) | Leaf age class                               | Eh (mV)     | Standard deviation | Ranking (5%) |
| Leaf 12                 | 278.7       | 28.7               | a            | Leaf 9    | 290.7       | 10.6               | a            | Leaf 8   | 280.9       | 29.0               | a            | Leaf 7              | 277.2       | 35.5               | a            | Leaf 6            | 281.0       | 17.9               | a            | 1                                            | 281.7       | 0.5                | a            |
| Leaf 11                 | 252.0       | 16.1               | a            | Leaf 8    | 246.3       | 9.1                | a            | Leaf 7   | 256.2       | 4.5                | a            | Leaf 6              | 253.8       | 16.8               | a            | Leaf 5            | 261.4       | 9.0                | a            | 2                                            | 253.9       | 11.8               | b            |
| Leaf 10                 | 255.0       | 9.6                | a            | Leaf 7    | 253.1       | 3.1                | a            | Leaf 6   | 250.2       | 13.7               | a            | Leaf 5              | 266.1       | 5.3                | a            | Leaf 4            | 254.0       | 17.2               | a            | 3                                            | 255.7       | 11.3               | b            |
| Leaf 9                  | 252.9       | 9.7                | a            | Leaf 6    | 250.9       | 12.3               | a            | Leaf 5   | 247.7       | 12.3               | a            | Leaf 4              | 263.7       | 18.5               | a            | Leaf 3            | 260.7       | 18.2               | a            | 4                                            | 255.2       | 14.4               | b            |
| Leaf 8                  | 251.0       | 11.1               | a            | Leaf 5    | 252.3       | 11.4               | a            | Leaf 4   | 258.8       | 7.5                | a            | Leaf 3              | 260.5       | 25.0               | a            | Leaf 2            |             |                    | a            | 5                                            | 254.7       | 11.8               | b            |
| Leaf 7                  | 250.7       | 18.0               | a            | Leaf 4    | 280.4       | 16.7               | a            | Leaf 3   | 274.4       | 1.0                | a            | Leaf 2              |             |                    |              | Leaf 1            |             |                    |              | 6                                            | 267.8       | 19.5               | b            |
| Leaf 6                  |             |                    |              | Leaf 3    |             |                    |              | Leaf 2   |             |                    |              | Leaf 1              |             |                    |              |                   |             |                    |              | Oldest                                       |             |                    |              |
| Main tiller             | pH          | Standard deviation | Ranking (5%) | Tiller 1  | pH          | Standard deviation | Ranking (5%) | Tiller 2 | pH          | Standard deviation | Ranking (5%) | Tiller 3            | pH          | Standard deviation | Ranking (5%) | Tiller 4          | pH          | Standard deviation | Ranking (5%) | Leaf age class                               | pH          | Standard deviation | Ranking (5%) |
| Leaf 12                 | 6.56        | 0.13               | a            | Leaf 9    | 6.47        | 0.15               | ab           | Leaf 8   | 6.39        | 0.05               | ab           | Leaf 7              | 6.30        | 0.14               | abc          | Leaf 6            | 6.31        | 0.11               | abc          | 1                                            | 6.40        | 0.15               | a            |
| Leaf 11                 | 6.27        | 0.18               | abc          | Leaf 8    | 6.27        | 0.13               | abc          | Leaf 7   | 6.18        | 0.07               | bcd          | Leaf 6              | 6.06        | 0.22               | cde          | Leaf 5            | 5.96        | 0.09               | de           | 2                                            | 6.15        | 0.20               | b            |
| Leaf 10                 | 5.98        | 0.11               | de           | Leaf 7    | 5.94        | 0.14               | de           | Leaf 6   | 5.90        | 0.14               | def          | Leaf 5              | 5.73        | 0.16               | efg          | Leaf 4            | 5.80        | 0.24               | efg          | 3                                            | 5.87        | 0.15               | c            |
| Leaf 9                  | 5.83        | 0.10               | efg          | Leaf 6    | 5.83        | 0.12               | efg          | Leaf 5   | 5.76        | 0.09               | efg          | Leaf 4              | 5.68        | 0.15               | efg          | Leaf 3            | 5.62        | 0.15               | efg          | 4                                            | 5.75        | 0.13               | d            |
| Leaf 8                  | 5.74        | 0.08               | efg          | Leaf 5    | 5.59        | 0.09               | fg           | Leaf 4   | 5.66        | 0.06               | efg          | Leaf 3              | 5.62        | *                  | efg          | Leaf 2            |             |                    |              | 5                                            | 5.66        | 0.10               | de           |
| Leaf 7                  | 5.65        | 0.13               | efg          | Leaf 4    | 5.46        | 0.08               | g            | Leaf 3   | 5.51        | 0.01               | fg           | Leaf 2              |             |                    |              | Leaf 1            |             |                    |              | 6                                            | 5.55        | 0.12               | e            |
| Leaf 6                  |             |                    |              | Leaf 3    |             |                    |              | Leaf 2   |             |                    |              | Leaf 1              |             |                    |              |                   |             |                    |              | Oldest                                       |             |                    |              |
| Main tiller             | Eh@pH7 (mV) | Standard deviation | Ranking (5%) | Tiller 1  | Eh@pH7 (mV) | Standard deviation | Ranking (5%) | Tiller 2 | Eh@pH7 (mV) | Standard deviation | Ranking (5%) | Tiller 3            | Eh@pH7 (mV) | Standard deviation | Ranking (5%) | Tiller 4          | Eh@pH7 (mV) | Standard deviation | Ranking (5%) | Leaf age class                               | Eh@pH7 (mV) | Standard deviation | Ranking (5%) |
| Leaf 12                 | 252.3       | 31.4               | a            | Leaf 9    | 258.9       | 19.5               | a            | Leaf 8   | 244.4       | 28.7               | ab           | Leaf 7              | 235.3       | 41.2               | abc          | Leaf 6            | 239.5       | 26.8               | abc          | 1                                            | 246.1       | 28.4               | a            |
| Leaf 11                 | 208.1       | 24.7               | bc           | Leaf 8    | 202.4       | 13.1               | c            | Leaf 7   | 207.1       | 8.5                | bc           | Leaf 6              | 197.2       | 14.1               | c            | Leaf 5            | 199.0       | 17.1               | c            | 2                                            | 202.8       | 15.2               | b            |
| Leaf 10                 | 193.6       | 11.3               | c            | Leaf 7    | 189.7       | 7.5                | c            | Leaf 6   | 184.0       | 18.4               | c            | Leaf 5              | 189.5       | 10.4               | c            | Leaf 4            | 182.1       | 22.5               | c            | 3                                            | 187.8       | 14.1               | c            |
| Leaf 9                  | 182.3       | 15.6               | c            | Leaf 6    | 180.8       | 14.4               | c            | Leaf 5   | 173.2       | 8.5                | c            | Leaf 4              | 175.9       | 16.6               | c            | Leaf 3            | 170.2       | 17.9               | c            | 4                                            | 176.9       | 13.6               | c            |
| Leaf 8                  | 175.3       | 9.7                | c            | Leaf 5    | 167.5       | 15.0               | c            | Leaf 4   | 179.1       | 6.8                | c            | Leaf 3              | 159.6       | *                  | c            | Leaf 2            |             |                    |              | 5                                            | 172.3       | 11.6               | c            |
| Leaf 7                  | 169.6       | 10.5               |              | Leaf 4    | 177.9       | 1.7                | c            | Leaf 3   | 184.5       | 0.4                | c            | Leaf 2              |             |                    |              | Leaf 1            |             |                    |              | 6                                            | 176.2       | 9.1                | c            |
| Leaf 6                  |             |                    |              | Leaf 3    |             |                    |              | Leaf 2   |             |                    |              | Leaf 1              |             |                    |              |                   |             |                    |              | Oldest                                       |             |                    |              |

Table S3.3. Intra-plant spatial variability of leaf Eh, pH and Eh@pH7 in season I on 39-40 DAS-old plants. Means over 4 plants, standard deviation and rankings based on pairwise comparisons of Eh, pH and Eh@pH7 depending on leaf position (Leaf 2 to 8) on four tillers (main and 1 to 3). Across tillers, leaves of the same ages are pooled into 3 age classes (1 to 3 from youngest to oldest), with corresponding mean, standard deviation and ranking. Plants of the rice variety Nerica4 were sown in 11 February 2016, then grown in aerobic conditions, without fertilization. Measurements were made on the middle part of the leaf. Mean temperature was 31.8°C and mean solar radiation intensity was 64.5W/m<sup>2</sup>. F-value and P of the ANOVA were Values followed by different letters indicate significant difference between leaf positions at 95% confidence interval (REGW-Q test). Leaf and tiller numbering according to Katayama (1951).

| Season I 11 February 2016 39-40 DAS |         |                    |              | n=4 Nerica 4 Upland No fertilizer |         |                    |              | Mean temp: 31.8°C |         |                    |              | Mean solar radiation : 64.5W/m <sup>2</sup> |         |                    |              |                |         |                    |              |
|-------------------------------------|---------|--------------------|--------------|-----------------------------------|---------|--------------------|--------------|-------------------|---------|--------------------|--------------|---------------------------------------------|---------|--------------------|--------------|----------------|---------|--------------------|--------------|
| Main tiller                         | Eh (mV) | Standard deviation | Ranking (5%) | Tiller 1                          | Eh (mV) | Standard deviation | Ranking (5%) | Tiller 2          | Eh (mV) | Standard deviation | Ranking (5%) | Tiller 3                                    | Eh (mV) | Standard deviation | Ranking (5%) | Leaf age class | Eh (mV) | Standard deviation | Ranking (5%) |
| Leaf 9                              |         |                    |              | Leaf 6                            |         |                    |              | Leaf 5            |         |                    |              | Leaf 4                                      |         |                    |              | Youngest       |         |                    |              |
| Leaf 8                              | 241.6   | 7.2                | a            | Leaf 5                            | 252.2   | 2.0                | a            | Leaf 4            | 242.0   | 6.4                | a            | Leaf 3                                      | 260.0   | 7.0                | a            | 1              | 252.1   | 9.6                | a            |
| Leaf 7                              | 241.5   | 10.4               | a            | Leaf 4                            | 241.8   | 6.1                | a            | Leaf 3            | 239.7   | 8.7                | a            | Leaf 2                                      | 251.3   | 1.1                | a            | 2              | 243.6   | 8.2                | a            |
| Leaf 6                              | 252.3   | 14.8               | a            | Leaf 3                            | 256.7   | 15.3               | a            | Leaf 2            | 244.5   | 10.0               | a            | Leaf 1                                      | 255.0   | 10.1               | a            | 3              | 250.0   | 12.4               | a            |
| Leaf 5                              |         |                    |              | Leaf 2                            |         |                    |              | Leaf 1            |         |                    |              |                                             |         |                    |              | Oldest         |         |                    |              |

  

| Main tiller | pH   | Standard deviation | Ranking (5%) | Tiller 1 | pH   | Standard deviation | Ranking (5%) | Tiller 2 | pH   | Standard deviation | Ranking (5%) | Tiller 3 | pH   | Standard deviation | Ranking (5%) | Leaf age class | pH   | Standard deviation | Ranking (5%) |
|-------------|------|--------------------|--------------|----------|------|--------------------|--------------|----------|------|--------------------|--------------|----------|------|--------------------|--------------|----------------|------|--------------------|--------------|
| Leaf 9      |      |                    |              | Leaf 6   |      |                    |              | Leaf 5   |      |                    |              | Leaf 4   |      |                    |              | Youngest       |      |                    |              |
| Leaf 8      | 6.70 | 0.16               | abc          | Leaf 5   | 6.81 | 0.04               | a            | Leaf 4   | 6.72 | 0.09               | ab           | Leaf 3   | 6.79 | 0.06               | a            | 1              | 6.75 | 0.10               | a            |
| Leaf 7      | 6.64 | 0.11               | abc          | Leaf 4   | 6.57 | 0.11               | abc          | Leaf 3   | 6.59 | 0.07               | abc          | Leaf 2   | 6.64 | 0.12               | abc          | 2              | 6.61 | 0.10               | b            |
| Leaf 6      | 6.41 | 0.05               | c            | Leaf 3   | 6.54 | 0.21               | abc          | Leaf 2   | 6.47 | 0.18               | bc           | Leaf 1   | 6.60 | 0.16               | abc          | 3              | 6.51 | 0.16               | c            |
| Leaf 5      |      |                    |              | Leaf 2   |      |                    |              | Leaf 1   |      |                    |              |          |      |                    |              | Oldest         |      |                    |              |

  

| Main tiller | Eh@pH7 (mV) | Standard deviation | Ranking (5%) | Tiller 1 | Eh@pH7 (mV) | Standard deviation | Ranking (5%) | Tiller 2 | Eh@pH7 (mV) | Standard deviation | Ranking (5%) | Tiller 3 | Eh@pH7 (mV) | Standard deviation | Ranking (5%) | Leaf age class | Eh@pH7 (mV) | Standard deviation | Ranking (5%) |
|-------------|-------------|--------------------|--------------|----------|-------------|--------------------|--------------|----------|-------------|--------------------|--------------|----------|-------------|--------------------|--------------|----------------|-------------|--------------------|--------------|
| Leaf 9      |             |                    |              | Leaf 6   |             |                    |              | Leaf 5   |             |                    |              | Leaf 4   |             |                    |              | Youngest       |             |                    |              |
| Leaf 8      | 223.6       | 5.8                | ab           | Leaf 5   | 240.9       | 3.7                | ab           | Leaf 4   | 225.2       | 9.4                | ab           | Leaf 3   | 247.3       | 7.6                | a            | 1              | 234.3       | 12.6               | a            |
| Leaf 7      | 220.0       | 15.6               | ab           | Leaf 4   | 215.9       | 2.3                | ab           | Leaf 3   | 215.0       | 10.1               | ab           | Leaf 2   | 229.9       | 7.2                | ab           | 2              | 222.5       | 10.8               | b            |
| Leaf 6      | 217.3       | 13.1               | ab           | Leaf 3   | 228.9       | 27.7               | ab           | Leaf 2   | 212.5       | 20.5               | b            | Leaf 1   | 231.2       | 18.9               | ab           | 3              | 220.2       | 20.2               | b            |
| Leaf 5      |             |                    |              | Leaf 2   |             |                    |              | Leaf 1   |             |                    |              |          |             |                    |              | Oldest         |             |                    |              |

Table S3.4. Effect of two opposite soil gradients (T1 = natural; T2 = opposite) on intra-plant spatial variability of leaf and soil Eh, pH and Eh@pH7 in season III for 30 DAS-old plants. Upper and Middle panels are T1 = natural soil gradient; and T2 = opposite soil gradient, respectively. Means over 4 plants, standard deviation and rankings based on pairwise comparisons depending on leaf position (Leaf 1 to 7) on four tillers (main and 1 to 3). Across tillers, leaves of the same ages are pooled into 6 age classes (1 to 6 from youngest to oldest), with corresponding means, standard deviations and ranking. Plants of the rice variety Nerica4 were sown in 19-22 November 2016, then grown in aerobic conditions, fertilized with Hoagland's solution. Measurements were made on the middle part of the leaf. Mean temperature was 29.8 and 29.1°C and mean solar radiation intensity was 35.0 and 31.8W/m<sup>2</sup> for T1 and T2, respectively. Lower panel is measurement across 3 soil depths (3, 8 and 13cm) for each of the two soil gradients. Means over 8 pots, standard deviation and rankings based on pairwise comparisons depending on depth. Values followed by different letters indicate significant difference between leaf positions at 95% confidence interval (REGW-Q test). Leaf and tiller numbering according to Katayama (1951).

| Season III 19-22 November 2016 |         |                    |              | 30 DAS n=4 |         |                    |              | Nerica 4 Upland |         |                    |              | Hoagland |         |                    |              | T1 = "Natural soil gradient" |         |                    |              | Mean temp: 29.8°C |  |  |  | Mean radiation: 35.0 W/m2 |  |  |  |
|--------------------------------|---------|--------------------|--------------|------------|---------|--------------------|--------------|-----------------|---------|--------------------|--------------|----------|---------|--------------------|--------------|------------------------------|---------|--------------------|--------------|-------------------|--|--|--|---------------------------|--|--|--|
| Main tiller                    | Eh (mV) | Standard deviation | Ranking (5%) | Tiller 1   | Eh (mV) | Standard deviation | Ranking (5%) | Tiller 2        | Eh (mV) | Standard deviation | Ranking (5%) | Tiller 3 | Eh (mV) | Standard deviation | Ranking (5%) | Leaf age class               | Eh (mV) | Standard deviation | Ranking (5%) |                   |  |  |  |                           |  |  |  |
| Leaf 8                         | 247.6   | 19.7               | bcd          | Leaf 5     | 270.3   | 16.2               | abc          | Leaf 4          | 234.2   | 7.3                | cd           | Leaf 3   | 253.9   | 12.0               | abcd         | Younguest                    | 1       | 250.2              | 18.1         | b                 |  |  |  |                           |  |  |  |
| Leaf 7                         | 220.9   | 4.9                | d            | Leaf 3     | 248.2   | 21.7               | bcd          | Leaf 2          | 245.4   | 22.7               | bcd          | Leaf 1   | 248.7   | 11.8               | bcd          | 2                            | 240.8   | 19.3               | b            |                   |  |  |  |                           |  |  |  |
| Leaf 6                         | 229.4   | 16.3               | cd           | Leaf 2     | 240.7   | 22.9               | bcd          | Leaf 1          | 270.4   | 37.4               | abc          |          |         |                    |              | 3                            | 246.8   | 30.4               | b            |                   |  |  |  |                           |  |  |  |
| Leaf 4                         | 240.2   | 6.6                | bcd          | Leaf 1     | 255.9   | 12.0               | abcd         |                 |         |                    |              |          |         |                    |              | 4                            | 248.1   | 12.3               | b            |                   |  |  |  |                           |  |  |  |
| Leaf 3                         | 280.9   | 17.0               | ab           |            |         |                    |              |                 |         |                    |              |          |         |                    |              | 5                            | 280.9   | 17.0               | a            |                   |  |  |  |                           |  |  |  |
| Leaf 2                         | 292.9   | 5.5                | a            |            |         |                    |              |                 |         |                    |              |          |         |                    |              | 6                            | 292.9   | 5.5                | a            |                   |  |  |  |                           |  |  |  |
|                                |         |                    |              |            |         |                    |              |                 |         |                    |              |          |         |                    |              | Oldest                       |         |                    |              |                   |  |  |  |                           |  |  |  |

| Season III 19-22 November 2016 |      |                    |              | 30 DAS n=4 |      |                    |              | Nerica 4 Upland |      |                    |              | Hoagland |      |                    |              | T1 = "Natural soil gradient" |      |                    |              | Mean temp: 29.8°C |  |  |  | Mean radiation: 35.0 W/m2 |  |  |  |
|--------------------------------|------|--------------------|--------------|------------|------|--------------------|--------------|-----------------|------|--------------------|--------------|----------|------|--------------------|--------------|------------------------------|------|--------------------|--------------|-------------------|--|--|--|---------------------------|--|--|--|
| Main tiller                    | pH   | Standard deviation | Ranking (5%) | Tiller 1   | pH   | Standard deviation | Ranking (5%) | Tiller 2        | pH   | Standard deviation | Ranking (5%) | Tiller 3 | pH   | Standard deviation | Ranking (5%) | Leaf age class               | pH   | Standard deviation | Ranking (5%) |                   |  |  |  |                           |  |  |  |
| Leaf 8                         | 6.75 | 0.08               | a            | Leaf 5     | 6.68 | 0.07               | a            | Leaf 4          | 6.62 | 0.14               | ab           | Leaf 3   | 6.66 | 0.11               | a            | Younguest                    | 1    | 6.68               | 0.11         | a                 |  |  |  |                           |  |  |  |
| Leaf 7                         | 6.66 | 0.04               | a            | Leaf 3     | 6.61 | 0.08               | ab           | Leaf 2          | 6.55 | 0.10               | abc          | Leaf 1   | 6.34 | 0.15               | cd           | 2                            | 6.55 | 0.15               | abc          |                   |  |  |  |                           |  |  |  |
| Leaf 6                         | 6.52 | 0.04               | abc          | Leaf 2     | 6.55 | 0.13               | abc          | Leaf 1          | 6.36 | 0.16               | bcd          |          |      |                    |              | 3                            | 6.49 | 0.13               | bc           |                   |  |  |  |                           |  |  |  |
| Leaf 4                         | 6.48 | 0.08               | abc          | Leaf 1     | 6.23 | 0.11               | d            |                 |      |                    |              |          |      |                    |              | 4                            | 6.40 | 0.15               | c            |                   |  |  |  |                           |  |  |  |
| Leaf 3                         |      |                    |              |            |      |                    |              |                 |      |                    |              |          |      |                    |              | 5                            |      |                    |              |                   |  |  |  |                           |  |  |  |
| Leaf 2                         |      |                    |              |            |      |                    |              |                 |      |                    |              |          |      |                    |              | 6                            |      |                    |              |                   |  |  |  |                           |  |  |  |
|                                |      |                    |              |            |      |                    |              |                 |      |                    |              |          |      |                    |              | Oldest                       |      |                    |              |                   |  |  |  |                           |  |  |  |

| Season III 19-22 November 2016 |             |                    |              | 30 DAS n=4 |             |                    |              | Nerica 4 Upland |             |                    |              | Hoagland |             |                    |              | T1 = "Natural soil gradient" |             |                    |              | Mean temp: 29.8°C |  |  |  | Mean radiation: 35.0 W/m2 |  |  |  |
|--------------------------------|-------------|--------------------|--------------|------------|-------------|--------------------|--------------|-----------------|-------------|--------------------|--------------|----------|-------------|--------------------|--------------|------------------------------|-------------|--------------------|--------------|-------------------|--|--|--|---------------------------|--|--|--|
| Main tiller                    | Eh@pH7 (mV) | Standard deviation | Ranking (5%) | Tiller 1   | Eh@pH7 (mV) | Standard deviation | Ranking (5%) | Tiller 2        | Eh@pH7 (mV) | Standard deviation | Ranking (5%) | Tiller 3 | Eh@pH7 (mV) | Standard deviation | Ranking (5%) | Leaf age class               | Eh@pH7 (mV) | Standard deviation | Ranking (5%) |                   |  |  |  |                           |  |  |  |
| Leaf 8                         | 232.6       | 22.2               | ab           | Leaf 5     | 251.4       | 20.3               | a            | Leaf 4          | 211.9       | 8.3                | ab           | Leaf 3   | 233.5       | 18.1               | ab           | Younguest                    | 1           | 231.1              | 21.1         | a                 |  |  |  |                           |  |  |  |
| Leaf 7                         | 200.4       | 2.6                | b            | Leaf 3     | 225.0       | 249.0              | ab           | Leaf 2          | 219.1       | 26.5               | ab           | Leaf 1   | 213.4       | 3.3                | ab           | 2                            | 214.2       | 18.8               | a            |                   |  |  |  |                           |  |  |  |
| Leaf 6                         | 200.8       | 14.8               | b            | Leaf 2     | 214.1       | 15.4               | ab           | Leaf 1          | 223.6       | 33.8               | ab           |          |             |                    |              | 3                            | 211.8       | 21.4               | a            |                   |  |  |  |                           |  |  |  |
| Leaf 4                         | 209.3       | 8.5                | ab           | Leaf 1     | 215.8       | 9.0                | ab           |                 |             |                    |              |          |             |                    |              | 4                            | 211.5       | 8.4                | a            |                   |  |  |  |                           |  |  |  |
| Leaf 3                         |             |                    |              |            |             |                    |              |                 |             |                    |              |          |             |                    |              | 5                            |             |                    |              |                   |  |  |  |                           |  |  |  |
| Leaf 2                         |             |                    |              |            |             |                    |              |                 |             |                    |              |          |             |                    |              | 6                            |             |                    |              |                   |  |  |  |                           |  |  |  |
|                                |             |                    |              |            |             |                    |              |                 |             |                    |              |          |             |                    |              | Oldest                       |             |                    |              |                   |  |  |  |                           |  |  |  |

| Season III 19-22 November 2016 |         |                    |              | 30 DAS n=4 |         |                    |              | Nerica 4 Upland |         |                    |              | Hoagland |         |                    |              | T2 = "Reversed soil gradient" |         |                    |              | Mean temp: 29.1°C |  |  |  | Mean radiation: 31.8 W/m2 |  |  |  |
|--------------------------------|---------|--------------------|--------------|------------|---------|--------------------|--------------|-----------------|---------|--------------------|--------------|----------|---------|--------------------|--------------|-------------------------------|---------|--------------------|--------------|-------------------|--|--|--|---------------------------|--|--|--|
| Main tiller                    | Eh (mV) | Standard deviation | Ranking (5%) | Tiller 1   | Eh (mV) | Standard deviation | Ranking (5%) | Tiller 2        | Eh (mV) | Standard deviation | Ranking (5%) | Tiller 3 | Eh (mV) | Standard deviation | Ranking (5%) | Leaf age class                | Eh (mV) | Standard deviation | Ranking (5%) |                   |  |  |  |                           |  |  |  |
| Leaf 8                         | 243.4   | 12.5               | abc          | Leaf 5     | 245.9   | 13.5               | abc          | Leaf 4          | 245.9   | 39.7               | abc          | Leaf 3   | 250.6   | 24.3               | abc          | Younguest                     | 1       | 246.4              | 22.5         | bc                |  |  |  |                           |  |  |  |
| Leaf 7                         | 196.7   | 12.3               | c            | Leaf 3     | 236.1   | 11.0               | abc          | Leaf 2          | 240.9   | 15.4               | abc          | Leaf 1   | 245.3   | 40.2               | abc          | 2                             | 229.7   | 28.7               | c            |                   |  |  |  |                           |  |  |  |
| Leaf 6                         | 214.4   | 17.1               | bc           | Leaf 2     | 249.6   | 30.8               | bc           | Leaf 1          | 245.6   | 24.8               | abc          |          |         |                    |              | 3                             | 237.5   | 27.1               | bc           |                   |  |  |  |                           |  |  |  |
| Leaf 4                         | 234.6   | 13.7               | bc           | Leaf 1     |         |                    |              |                 |         |                    |              |          |         |                    |              | 4                             | 234.6   | 13.7               | bc           |                   |  |  |  |                           |  |  |  |
| Leaf 3                         | 274.1   | 31.8               | ab           |            |         |                    |              |                 |         |                    |              |          |         |                    |              | 5                             | 274.1   | 31.8               | ab           |                   |  |  |  |                           |  |  |  |
| Leaf 2                         | 294.8   | 7.6                | a            |            |         |                    |              |                 |         |                    |              |          |         |                    |              | 6                             | 294.8   | 7.6                | a            |                   |  |  |  |                           |  |  |  |
|                                |         |                    |              |            |         |                    |              |                 |         |                    |              |          |         |                    |              | Oldest                        |         |                    |              |                   |  |  |  |                           |  |  |  |

| Season III 19-22 November 2016 |      |                    |              | 30 DAS n=4 |      |                    |              | Nerica 4 Upland |      |                    |              | Hoagland |      |                    |              | T2 = "Reversed soil gradient" |      |                    |              | Mean temp: 29.1°C |  |  |  | Mean radiation: 31.8 W/m2 |  |  |  |
|--------------------------------|------|--------------------|--------------|------------|------|--------------------|--------------|-----------------|------|--------------------|--------------|----------|------|--------------------|--------------|-------------------------------|------|--------------------|--------------|-------------------|--|--|--|---------------------------|--|--|--|
| Main tiller                    | pH   | Standard deviation | Ranking (5%) | Tiller 1   | pH   | Standard deviation | Ranking (5%) | Tiller 2        | pH   | Standard deviation | Ranking (5%) | Tiller 3 | pH   | Standard deviation | Ranking (5%) | Leaf age class                | pH   | Standard deviation | Ranking (5%) |                   |  |  |  |                           |  |  |  |
| Leaf 8                         | 6.78 | 0.08               | a            | Leaf 5     | 6.66 | 0.09               | ab           | Leaf 4          | 6.77 | 0.07               | abc          | Leaf 3   | 6.51 | 0.36               | abcd         | Younguest                     | 1    | 6.70               | 0.16         | ab                |  |  |  |                           |  |  |  |
| Leaf 7                         | 6.68 | 0.07               | ab           | Leaf 3     | 6.51 | 0.08               | abcd         | Leaf 2          | 6.62 | 0.13               | abc          | Leaf 1   | 6.37 | 0.11               | cd           | 2                             | 6.56 | 0.15               | ab           |                   |  |  |  |                           |  |  |  |
| Leaf 6                         | 6.46 | 0.07               | bcd          | Leaf 2     | 6.28 | *                  | d            | Leaf 1          | 6.32 | *                  | d            |          |      |                    |              | 3                             | 6.41 | 0.10               | b            |                   |  |  |  |                           |  |  |  |
| Leaf 4                         | 6.41 | 0.08               | bcd          | Leaf 1     |      |                    |              |                 |      |                    |              |          |      |                    |              | 4                             | 6.41 | 0.08               | b            |                   |  |  |  |                           |  |  |  |
| Leaf 3                         |      |                    |              |            |      |                    |              |                 |      |                    |              |          |      |                    |              | 5                             |      |                    |              |                   |  |  |  |                           |  |  |  |
| Leaf 2                         |      |                    |              |            |      |                    |              |                 |      |                    |              |          |      |                    |              | 6                             |      |                    |              |                   |  |  |  |                           |  |  |  |
|                                |      |                    |              |            |      |                    |              |                 |      |                    |              |          |      |                    |              | Oldest                        |      |                    |              |                   |  |  |  |                           |  |  |  |

| Season III 19-22 November 2016 |             |                    |              | 30 DAS n=4 |             |                    |              | Nerica 4 Upland |             |                    |              | Hoagland |             |                    |              | T2 = "Reversed soil gradient" |             |                    |              | Mean temp: 29.1°C |  |  |  | Mean radiation: 31.8 W/m2 |  |  |  |
|--------------------------------|-------------|--------------------|--------------|------------|-------------|--------------------|--------------|-----------------|-------------|--------------------|--------------|----------|-------------|--------------------|--------------|-------------------------------|-------------|--------------------|--------------|-------------------|--|--|--|---------------------------|--|--|--|
| Main tiller                    | Eh@pH7 (mV) | Standard deviation | Ranking (5%) | Tiller 1   | Eh@pH7 (mV) | Standard deviation | Ranking (5%) | Tiller 2        | Eh@pH7 (mV) | Standard deviation | Ranking (5%) | Tiller 3 | Eh@pH7 (mV) | Standard deviation | Ranking (5%) | Leaf age class                | Eh@pH7 (mV) | Standard deviation | Ranking (5%) |                   |  |  |  |                           |  |  |  |
| Leaf 8                         | 230.2       | 9.5                | a            | Leaf 5     | 225.8       | 18.6               | a            | Leaf 4          | 213.2       | 11.5               | a            | Leaf 3   | 203.4       | 16.8               | a            | Younguest                     | 1           | 220.8              | 16.0         | a                 |  |  |  |                           |  |  |  |
| Leaf 7                         | 177.5       | 9.8                | a            | Leaf 3     | 207.7       | 14.3               | a            | Leaf 2          | 218.2       | 16.1               | a            | Leaf 1   | 187.7       | 6.9                | a            | 2                             | 197.8       | 20.5               | ab           |                   |  |  |  |                           |  |  |  |
| Leaf 6                         | 185.3       | 19.5               | a            | Leaf 2     | 172.0       | *                  | a            | Leaf 1          | 186.4       | *                  | a            |          |             |                    |              | 3                             | 183.8       | 16.1               | b            |                   |  |  |  |                           |  |  |  |
| Leaf 4                         | 199.3       | 16.4               | a            | Leaf 1     |             |                    |              |                 |             |                    |              |          |             |                    |              | 4                             | 199.3       | 16.4               | ab           |                   |  |  |  |                           |  |  |  |
| Leaf 3                         |             |                    |              |            |             |                    |              |                 |             |                    |              |          |             |                    |              | 5                             |             |                    |              |                   |  |  |  |                           |  |  |  |
| Leaf 2                         |             |                    |              |            |             |                    |              |                 |             |                    |              |          |             |                    |              | 6                             |             |                    |              |                   |  |  |  |                           |  |  |  |
|                                |             |                    |              |            |             |                    |              |                 |             |                    |              |          |             |                    |              | Oldest                        |             |                    |              |                   |  |  |  |                           |  |  |  |



| Season III               | 19-22 November 2016 | <b>30 DAS</b> n=8 |                    |              | Soil | Upland             | Hoagland     |             |                    |              |
|--------------------------|---------------------|-------------------|--------------------|--------------|------|--------------------|--------------|-------------|--------------------|--------------|
| Soil treatment           | Soil depth (cm)     | Eh (mV)           | Standard deviation | Ranking (5%) | pH   | Standard deviation | Ranking (5%) | Eh@pH7 (mV) | Standard deviation | Ranking (5%) |
| T1 =                     | 3                   | 510               | 20.1               | d            | 6.40 | 0.19               | a            | 474         | 20.0               | b            |
| "Natural soil gradient"  | 8                   | 570               | 11.2               | bc           | 6.16 | 0.12               | b            | 520         | 7.2                | a            |
|                          | 13                  | 604               | 17.4               | ab           | 5.85 | 0.06               | c            | 536         | 19.5               | a            |
| T2 =                     | 3                   | 593               | 43.9               | ab           | 5.68 | 0.18               | c            | 514         | 37.8               | ab           |
| "Reversed soil gradient" | 8                   | 608               | 16.6               | ab           | 5.82 | 0.14               | c            | 538         | 16.9               | a            |
|                          | 13                  | 538               | 43.0               | cd           | 6.49 | 0.20               | c            | 509         | 51.2               | ab           |

Table S3.5. Effect of two opposite soil gradients (T1 = natural; T2 = opposite) on intra-plant spatial variability of leaf and soil Eh, pH and Eh@pH7 in season III for 58 DAS-old plants. Upper and Middle panels are T1 = natural soil gradient; and T2 = opposite soil gradient, respectively. Means over 3 plants, standard deviation and rankings based on pairwise comparisons depending on leaf position (Leaf 2 to 11) on six tillers (main, Tillers 1 to 3 and Tiller 1.1). Across tillers, leaves of the same ages are pooled into 6 age classes (1 to 6 from youngest to oldest), with corresponding means, standard deviations and ranking. Plants of the rice variety Nerica 4 were sown in 19-22 November 2016, then grown in aerobic conditions, fertilized with Hoagland's solution. Measurements were made on the middle part of the leaf. Mean temperature was 28.9°C and mean solar radiation intensity was 38.2 and 43.4W/m<sup>2</sup> for T1 and T2, respectively. Lower panel is measurement across 3 soil depths (3, 8 and 13cm) for each of the two soil gradients. Means over 6 pots, standard deviation and rankings based on pairwise comparisons depending on depth. Values followed by different letters indicate significant difference between leaf positions at 95% confidence interval (REGW-Q test). Leaf and tiller numbering according to Katayama (1951).

| Season III 19-22 November 2016 |             |                    |              | 58 DAS   |             |                    | n=3          |          |             | Nerica 4           |              |          | Upland      |                    |              | Hoagland |             |                    | T1 = "Natural soil gradient" |            |             |                    | Mean temp: 28.9°C |                |             |                    | Mean solar radiation : 38.2 W/m2 |   |  |  |  |  |  |  |
|--------------------------------|-------------|--------------------|--------------|----------|-------------|--------------------|--------------|----------|-------------|--------------------|--------------|----------|-------------|--------------------|--------------|----------|-------------|--------------------|------------------------------|------------|-------------|--------------------|-------------------|----------------|-------------|--------------------|----------------------------------|---|--|--|--|--|--|--|
| Main tiller                    | Eh (mV)     | Standard deviation | Ranking (5%) | Tiller 1 | Eh (mV)     | Standard deviation | Ranking (5%) | Tiller 2 | Eh (mV)     | Standard deviation | Ranking (5%) | Tiller 3 | Eh (mV)     | Standard deviation | Ranking (5%) | Tiller 4 | Eh (mV)     | Standard deviation | Ranking (5%)                 | Tiller 1-1 | Eh (mV)     | Standard deviation | Ranking (5%)      | Leaf age class | Eh (mV)     | Standard deviation | Ranking (5%)                     |   |  |  |  |  |  |  |
| Leaf 12                        |             |                    |              | Leaf 9   |             |                    |              | Leaf 8   |             |                    |              | Leaf 7   |             |                    |              | Leaf 6   |             |                    |                              | Leaf 6     |             |                    |                   | Youngest       | 1           | 265.9              | 23.7                             | a |  |  |  |  |  |  |
| Leaf 11                        | 255.4       | 21.6               | a            | Leaf 8   | 257.7       | 21.6               | a            | Leaf 7   | 256.7       | 50.4               | a            | Leaf 6   | 256.9       | 2.5                | a            | Leaf 5   | 294.4       | 24.1               | a                            | Leaf 5     |             |                    |                   |                | 2           | 260.8              | 11.8                             | a |  |  |  |  |  |  |
| Leaf 10                        | 260.1       | 12.1               | a            | Leaf 7   | 268.1       | 12.8               | a            | Leaf 6   | 260.9       | 9.6                | a            | Leaf 5   | 270.6       | 17.1               | a            | Leaf 4   | 262.5       | 14.0               | a                            | Leaf 4     | 270.2       | 5.7                | a                 |                | 3           | 263.1              | 9.9                              | a |  |  |  |  |  |  |
| Leaf 9                         | 257.1       | 2.1                | a            | Leaf 6   | 257.8       | 13.3               | a            | Leaf 5   | 273.3       | 2.1                | a            | Leaf 4   | 255.9       | 11.3               | a            | Leaf 3   | 262.4       | 10.9               | a                            | Leaf 3     | 255.8       | 15.9               | a                 |                | 4           | 269.8              | 17.8                             | a |  |  |  |  |  |  |
| Leaf 8                         | 255.0       | 5.9                | a            | Leaf 5   | 259.8       | 15.7               | a            | Leaf 4   | 253.6       | 2.2                | a            | Leaf 3   | 263.1       | 3.4                | a            | Leaf 2   | 297.4       | 5.4                | a                            | Leaf 2     | 280.8       | 13.9               | a                 |                | 5           | 259.4              | 15.5                             | a |  |  |  |  |  |  |
| Leaf 7                         | 262.3       | 13.2               | a            | Leaf 4   | 260.5       | 4.0                | a            | Leaf 3   | 258.6       | 2.6                | a            | Leaf 2   | 279.6       | 7.3                | a            | Leaf 1   |             |                    |                              | Leaf 1     |             |                    |                   |                | 6           | 280.8              | 18.5                             | a |  |  |  |  |  |  |
| Leaf 6                         | 274.1       | 30.0               | a            | Leaf 3   |             |                    |              | Leaf 2   |             |                    |              | Leaf 1   |             |                    |              |          |             |                    |                              |            |             |                    | Oldest            |                |             |                    |                                  |   |  |  |  |  |  |  |
| Leaf 5                         |             |                    |              | Leaf 2   |             |                    |              | Leaf 1   |             |                    |              |          |             |                    |              |          |             |                    |                              |            |             |                    |                   |                |             |                    |                                  |   |  |  |  |  |  |  |
| Main tiller                    | pH          | Standard deviation | Ranking (5%) | Tiller 1 | pH          | Standard deviation | Ranking (5%) | Tiller 2 | pH          | Standard deviation | Ranking (5%) | Tiller 3 | pH          | Standard deviation | Ranking (5%) | Tiller 4 | pH          | Standard deviation | Ranking (5%)                 | Tiller 1-1 | pH          | Standard deviation | Ranking (5%)      | Leaf age class | pH          | Standard deviation | Ranking (5%)                     |   |  |  |  |  |  |  |
| Leaf 12                        |             |                    |              | Leaf 9   |             |                    |              | Leaf 8   |             |                    |              | Leaf 7   |             |                    |              | Leaf 6   |             |                    |                              | Leaf 6     |             |                    |                   | Youngest       | 1           | 6.56               | 0.18                             | a |  |  |  |  |  |  |
| Leaf 11                        | 6.74        | 0.01               | a            | Leaf 8   | 6.69        | 0.02               | a            | Leaf 7   | 6.52        | 0.15               | abc          | Leaf 6   | 6.46        | 0.02               | abcd         | Leaf 5   | 6.57        | 0.15               | ab                           | Leaf 5     |             |                    |                   |                | 2           | 6.22               | 0.16                             | b |  |  |  |  |  |  |
| Leaf 10                        | 6.45        | 0.23               | abcd         | Leaf 7   | 6.34        | 0.16               | bcd          | Leaf 6   | 6.23        | 0.23               | defgh        | Leaf 5   | 6.31        | 0.21               | bcd          | Leaf 4   | 6.18        | 0.08               | defghi                       | Leaf 4     | 6.26        | 0.11               | cdefg             |                | 3           | 6.02               | 0.10                             | c |  |  |  |  |  |  |
| Leaf 9                         | 6.17        | 0.11               | defghi       | Leaf 6   | 6.09        | 0.13               | efghi        | Leaf 5   | 6.10        | 0.06               | efghi        | Leaf 4   | 6.00        | 0.07               | fghi         | Leaf 3   | 5.91        | 0.03               | hi                           | Leaf 3     | 5.96        | 0.05               | ghi               |                | 4           | 5.94               | 0.12                             | c |  |  |  |  |  |  |
| Leaf 8                         | 6.09        | 0.02               | efghi        | Leaf 5   | 6.02        | 0.07               | efghi        | Leaf 4   | 5.96        | 0.05               | ghi          | Leaf 3   | 5.90        | 0.13               | hi           | Leaf 2   | 5.83        | 0.08               | i                            | Leaf 2     | 5.85        | 0.06               | i                 |                | 5           | 5.93               | 0.15                             | c |  |  |  |  |  |  |
| Leaf 7                         | 6.08        | 0.06               | efghi        | Leaf 4   | 5.96        | 0.03               | ghi          | Leaf 3   | 5.82        | 0.07               | i            | Leaf 2   | 5.79        | 0.13               | i            | Leaf 1   |             |                    |                              | Leaf 1     |             |                    |                   |                | 6           | 5.95               | 0.04                             | c |  |  |  |  |  |  |
| Leaf 6                         | 5.95        | 0.04               | ghi          | Leaf 3   |             |                    |              | Leaf 2   |             |                    |              | Leaf 1   |             |                    |              |          |             |                    |                              |            |             |                    | Oldest            |                |             |                    |                                  |   |  |  |  |  |  |  |
| Leaf 5                         |             |                    |              | Leaf 2   |             |                    |              | Leaf 1   |             |                    |              |          |             |                    |              |          |             |                    |                              |            |             |                    |                   |                |             |                    |                                  |   |  |  |  |  |  |  |
| Main tiller                    | Eh@pH7 (mV) | Standard deviation | Ranking (5%) | Tiller 1 | Eh@pH7 (mV) | Standard deviation | Ranking (5%) | Tiller 2 | Eh@pH7 (mV) | Standard deviation | Ranking (5%) | Tiller 3 | Eh@pH7 (mV) | Standard deviation | Ranking (5%) | Tiller 4 | Eh@pH7 (mV) | Standard deviation | Ranking (5%)                 | Tiller 1-1 | Eh@pH7 (mV) | Standard deviation | Ranking (5%)      | Leaf age class | Eh@pH7 (mV) | Standard deviation | Ranking (5%)                     |   |  |  |  |  |  |  |
| Leaf 12                        |             |                    |              | Leaf 9   |             |                    |              | Leaf 8   |             |                    |              | Leaf 7   |             |                    |              | Leaf 6   |             |                    |                              | Leaf 6     |             |                    |                   | Youngest       | 1           | 239.6              | 26.1                             | a |  |  |  |  |  |  |
| Leaf 11                        | 240.1       | 20.7               | ab           | Leaf 8   | 239.1       | 23.0               | ab           | Leaf 7   | 228.5       | 50.7               | ab           | Leaf 6   | 229.7       | 6.5                | ab           | Leaf 5   | 269.1       | 20.4               | a                            | Leaf 5     |             |                    |                   |                | 2           | 214.2              | 17.6                             | b |  |  |  |  |  |  |
| Leaf 10                        | 227.4       | 24.0               | ab           | Leaf 7   | 228.9       | 20.9               | ab           | Leaf 6   | 215.0       | 6.6                | b            | Leaf 5   | 196.3       | 7.2                | ab           | Leaf 4   | 213.7       | 16.1               | b                            | Leaf 4     | 226.2       | 10.7               | ab                |                | 3           | 204.4              | 10.5                             | b |  |  |  |  |  |  |
| Leaf 9                         | 207.6       | 8.5                | b            | Leaf 6   | 203.3       | 16.1               | b            | Leaf 5   | 220.0       | 4.2                | b            | Leaf 4   | 197.4       | 6.3                | b            | Leaf 3   | 197.5       | 9.3                | b                            | Leaf 3     | 193.7       | 19.1               | b                 |                | 4           | 206.6              | 14.3                             | b |  |  |  |  |  |  |
| Leaf 8                         | 200.6       | 6.9                | b            | Leaf 5   | 201.7       | 0.4                | b            | Leaf 4   | 191.5       | 4.9                | b            | Leaf 3   | 207.2       | 0.3                | b            | Leaf 2   | 227.6       | 2.0                | ab                           | Leaf 2     | 212.3       | 10.1               | b                 |                | 5           | 195.3              | 16.0                             | b |  |  |  |  |  |  |
| Leaf 7                         | 207.5       | 13.6               | b            | Leaf 4   | 198.7       | 2.3                | b            | Leaf 3   | 188.0       | 6.8                | b            | Leaf 2   |             |                    |              | Leaf 1   |             |                    |                              | Leaf 1     |             |                    |                   |                | 6           | 218.2              | 17.4                             | b |  |  |  |  |  |  |
| Leaf 6                         | 210.5       | 30.5               | b            | Leaf 3   |             |                    |              | Leaf 2   |             |                    |              | Leaf 1   |             |                    |              |          |             |                    |                              |            |             |                    | Oldest            |                |             |                    |                                  |   |  |  |  |  |  |  |
| Leaf 5                         |             |                    |              | Leaf 2   |             |                    |              | Leaf 1   |             |                    |              |          |             |                    |              |          |             |                    |                              |            |             |                    |                   |                |             |                    |                                  |   |  |  |  |  |  |  |

| Season III 19-22 November 2016 |         |                    |              | 58 DAS n=3 |         |                    | Nerica 4 Upland |          |         | Hoagland           |              |          | T2 = "Reversed soil gradient" |                    |              | Mean temp: 28.9°C |         |                    | Mean solar radiation : 43.4 W/m2 |            |         |                    |              |                |         |                    |              |  |
|--------------------------------|---------|--------------------|--------------|------------|---------|--------------------|-----------------|----------|---------|--------------------|--------------|----------|-------------------------------|--------------------|--------------|-------------------|---------|--------------------|----------------------------------|------------|---------|--------------------|--------------|----------------|---------|--------------------|--------------|--|
| Main tiller                    | Eh (mV) | Standard deviation | Ranking (5%) | Tiller 1   | Eh (mV) | Standard deviation | Ranking (5%)    | Tiller 2 | Eh (mV) | Standard deviation | Ranking (5%) | Tiller 3 | Eh (mV)                       | Standard deviation | Ranking (5%) | Tiller 4          | Eh (mV) | Standard deviation | Ranking (5%)                     | Tiller 1-1 | Eh (mV) | Standard deviation | Ranking (5%) | Leaf age class | Eh (mV) | Standard deviation | Ranking (5%) |  |
| Leaf 12                        |         |                    |              | Leaf 9     |         |                    |                 | Leaf 8   |         |                    |              | Leaf 7   |                               |                    |              | Leaf 6            |         |                    |                                  | Leaf 6     |         |                    |              | Youngest       |         |                    |              |  |
| Leaf 11                        | 246.2   | 6.4                | a            | Leaf 8     | 272.5   | 28.4               | a               | Leaf 7   | 291.3   | 13.2               | a            | Leaf 6   | 275.0                         | 14.1               | a            | Leaf 5            |         |                    |                                  | Leaf 5     |         |                    |              | 1              | 275.1   | 21.5               | a            |  |
| Leaf 10                        | 275.8   | 28.6               | a            | Leaf 7     | 261.7   | 5.8                | a               | Leaf 6   | 255.3   | 11.9               | a            | Leaf 5   | 272.0                         | 30.6               | a            | Leaf 4            | 257.0   | 11.4               | a                                | Leaf 4     |         |                    |              | 2              | 261.9   | 10.2               | a            |  |
| Leaf 9                         | 255.2   | 17.6               | a            | Leaf 6     | 273.6   | 9.7                | a               | Leaf 5   | 261.4   | 14.0               | a            | Leaf 4   | 255.0                         | 12.1               | a            | Leaf 3            | 269.2   | 20.3               | a                                | Leaf 3     | 267.9   | 11.2               | a            | 3              | 264.4   | 16.9               | a            |  |
| Leaf 8                         | 250.2   | 12.9               | a            | Leaf 5     | 250.3   | 4.0                | a               | Leaf 4   | 260.8   | 17.8               | a            | Leaf 3   | 248.9                         | 6.6                | a            | Leaf 2            | 266.4   | 2.9                | a                                | Leaf 2     | 270.1   | 5.0                | a            | 4              | 258.4   | 18.0               | a            |  |
| Leaf 7                         | 251.7   | 5.6                | a            | Leaf 4     |         |                    |                 | Leaf 3   | 260.7   | 18.5               | a            | Leaf 2   | 249.5                         | 6.8                | a            | Leaf 1            | 293.7   | 1.4                | a                                | Leaf 1     | 293.3   | 13.5               | a            | 5              | 256.0   | 13.4               | a            |  |
| Leaf 6                         | 268.0   | 4.3                | a            | Leaf 3     |         |                    |                 | Leaf 2   |         |                    |              |          |                               |                    |              |                   |         |                    |                                  |            |         |                    | 6            |                |         |                    |              |  |
| Leaf 5                         |         |                    |              | Leaf 2     |         |                    |                 | Leaf 1   |         |                    |              |          |                               |                    |              |                   |         |                    |                                  |            |         |                    | Oldest       |                |         |                    |              |  |

| Main tiller | pH   | Standard deviation | Ranking (5%) | Tiller 1 | pH   | Standard deviation | Ranking (5%) | Tiller 2 | pH   | Standard deviation | Ranking (5%) | Tiller 3 | pH   | Standard deviation | Ranking (5%) | Tiller 4 | pH   | Standard deviation | Ranking (5%) | Tiller 1-1 | pH   | Standard deviation | Ranking (5%) | Leaf age class | pH   | Standard deviation | Ranking (5%) |
|-------------|------|--------------------|--------------|----------|------|--------------------|--------------|----------|------|--------------------|--------------|----------|------|--------------------|--------------|----------|------|--------------------|--------------|------------|------|--------------------|--------------|----------------|------|--------------------|--------------|
| Leaf 12     |      |                    |              | Leaf 9   |      |                    |              | Leaf 8   |      |                    |              | Leaf 7   |      |                    |              | Leaf 6   |      |                    |              | Leaf 6     |      |                    |              | Youngest       |      |                    |              |
| Leaf 11     | 6.53 | 0.42               | a            | Leaf 8   | 6.51 | 0.27               | a            | Leaf 7   | 6.72 | 0.07               | a            | Leaf 6   | 6.52 | 0.32               | a            | Leaf 5   |      |                    |              | Leaf 5     |      |                    |              | 1              | 6.56 | 0.23               | a            |
| Leaf 10     | 6.38 | 0.27               | a            | Leaf 7   | 6.29 | 0.22               | a            | Leaf 6   | 6.50 | 0.14               | a            | Leaf 5   | 6.40 | 0.26               | a            | Leaf 4   | 6.62 | 0.10               | a            | Leaf 4     |      |                    |              | 2              | 6.33 | 0.19               | b            |
| Leaf 9      | 6.21 | 0.25               | a            | Leaf 6   | 6.12 | 0.19               | a            | Leaf 5   | 6.19 | 0.07               | a            | Leaf 4   | 6.20 | 0.3                | a            | Leaf 3   | 6.31 | 0.3                | a            | Leaf 3     | 6.36 | *                  | a            | 3              | 6.13 | 0.16               | b            |
| Leaf 8      | 6.17 | 0.25               | a            | Leaf 5   | 5.93 | 0.07               | a            | Leaf 4   | 6.00 | 0.07               | a            | Leaf 3   | 6.03 | 0.13               | a            | Leaf 2   | 6.09 | 0.21               | a            | Leaf 2     | 6.23 | 0.46               | a            | 4              | 6.00 | 0.09               | b            |
| Leaf 7      | 6.11 | 0.16               | a            | Leaf 4   |      |                    |              | Leaf 3   | 5.93 | 0.11               | a            | Leaf 2   | 5.98 | 0.08               | a            | Leaf 1   |      |                    |              | Leaf 1     |      |                    |              | 5              | 5.99 | 0.12               | b            |
| Leaf 6      | 6.05 | 0.17               | a            | Leaf 3   |      |                    |              | Leaf 2   |      |                    |              | Leaf 1   |      |                    |              |          |      |                    |              |            |      |                    | 6            | 5.93           | *    | b                  |              |
| Leaf 5      |      |                    |              | Leaf 2   |      |                    |              | Leaf 1   |      |                    |              |          |      |                    |              |          |      |                    |              |            |      |                    | Oldest       |                |      |                    |              |

| Main tiller | Eh@pH7 (mV) | Standard deviation | Ranking (5%) | Tiller 1 | Eh@pH7 (mV) | Standard deviation | Ranking (5%) | Tiller 2 | Eh@pH7 (mV) | Standard deviation | Ranking (5%) | Tiller 3 | Eh@pH7 (mV) | Standard deviation | Ranking (5%) | Tiller 4 | Eh@pH7 (mV) | Standard deviation | Ranking (5%) | Tiller 1-1 | Eh@pH7 (mV) | Standard deviation | Ranking (5%) | Leaf age class | Eh@pH7 (mV) | Standard deviation | Ranking (5%) |
|-------------|-------------|--------------------|--------------|----------|-------------|--------------------|--------------|----------|-------------|--------------------|--------------|----------|-------------|--------------------|--------------|----------|-------------|--------------------|--------------|------------|-------------|--------------------|--------------|----------------|-------------|--------------------|--------------|
| Leaf 12     |             |                    |              | Leaf 9   |             |                    |              | Leaf 8   |             |                    |              | Leaf 7   |             |                    |              | Leaf 6   |             |                    |              | Leaf 6     |             |                    |              | Youngest       |             |                    |              |
| Leaf 11     | 218.0       | 18.7               | ab           | Leaf 8   | 243.3       | 37.8               | ab           | Leaf 7   | 274.8       | 12.8               | a            | Leaf 6   | 246.3       | 33.2               | ab           | Leaf 5   |             |                    |              | Leaf 5     |             |                    |              | 1              | 250.2       | 29.1               | a            |
| Leaf 10     | 239.1       | 43.9               | ab           | Leaf 7   | 219.6       | 16.7               | ab           | Leaf 6   | 225.7       | 19.9               | ab           | Leaf 5   | 236.3       | 40.6               | ab           | Leaf 4   | 234.6       | 5.5                | ab           | Leaf 4     |             |                    |              | 2              | 21.2        | 16.7               | ab           |
| Leaf 9      | 208.3       | 32.3               | ab           | Leaf 6   | 221.3       | 18.2               | ab           | Leaf 5   | 213.0       | 17.3               | ab           | Leaf 4   | 207.6       | 22.8               | ab           | Leaf 3   | 228.3       | 37.1               | ab           | Leaf 3     | 234.0       | *                  | ab           | 3              | 208.4       | 17.2               | abc          |
| Leaf 8      | 200.5       | 26.4               | ab           | Leaf 5   | 186.7       | 7.6                | b            | Leaf 4   | 201.2       | 16.8               | ab           | Leaf 3   | 191.2       | 8.9                | ab           | Leaf 2   | 212.6       | 8.8                | ab           | Leaf 2     | 228.8       | 38.8               | ab           | 4              | 192.9       | 12.6               | c            |
| Leaf 7      | 197.1       | 16.3               | ab           | Leaf 4   |             |                    |              | Leaf 3   | 207.3       | 11.7               | ab           | Leaf 2   | 188.2       | 11.4               | b            | Leaf 1   |             |                    |              | Leaf 1     |             |                    |              | 5              | 199.2       | 16.5               | bc           |
| Leaf 6      | 211.4       | 5.8                | ab           | Leaf 3   |             |                    |              | Leaf 2   |             |                    |              | Leaf 1   |             |                    |              |          |             |                    |              |            |             |                    | 6            | 207.3          | *           | abc                |              |
| Leaf 5      |             |                    |              | Leaf 2   |             |                    |              | Leaf 1   |             |                    |              |          |             |                    |              |          |             |                    |              |            |             |                    | Oldest       |                |             |                    |              |

| Season III                       | 19-22 November 2016 | 58 DAS  | n=6                | Soil         | Upland | Hoagland           |              |             |                    |              |
|----------------------------------|---------------------|---------|--------------------|--------------|--------|--------------------|--------------|-------------|--------------------|--------------|
| Soil treatment                   | Soil depth (cm)     | Eh (mV) | Standard deviation | Ranking (5%) | pH     | Standard deviation | Ranking (5%) | Eh@pH7 (mV) | Standard deviation | Ranking (5%) |
| T1 =<br>"Natural soil gradient"  | 3                   | 504     | 20.1               | d            | 6.69   | 0.19               | a            | 486         | 29.9               | b            |
|                                  | 8                   | 558     | 40.1               | c            | 6.34   | 0.37               | b            | 509         | 56.0               | ab           |
|                                  | 13                  | 580     | 30.0               | bc           |        |                    |              |             |                    |              |
| T2 =<br>"Reversed soil gradient" | 3                   | 619     | 17.7               | a            | 5.71   | 0.14               | c            | 542         | 18.3               | a            |
|                                  | 8                   | 608     | 15.1               | ab           | 5.96   | 0.09               | c            | 546         | 20.1               | a            |
|                                  | 13                  | 496     | 18.4               | d            |        |                    |              |             |                    |              |

Table S3.6. Effect of two water management regimes (Upland = aerobic; Lowland = anaerobic) and variety on intra-plant spatial variability of leaf Eh (Upper panel), pH (Middle panel) and Eh@pH7 (Lower panel) in season IV for 43-46 DAS-old plants. Within each panel, data are presented for the two varieties IR64 (in Upland and Lowland managements), and Nerica 4 (in Lowland management). Means over 4 plants, standard deviation and rankings based on pairwise comparisons depending on leaf position (Leaf 2 to 9) on three tillers (main, 1 and 2). Across tillers, leaves of the same ages are pooled into 4 age classes (1 to 4 from youngest to oldest), with corresponding means, standard deviations and ranking. Plants were sown in 13 February 2017, fertilized with Hoagland's solution. Measurements were made on the middle part of the leaf. Mean temperature was 32.0°C and mean solar radiation intensity was 50.7W/m<sup>2</sup>. Values followed by different letters indicate significant difference between leaf positions at 95% confidence interval (REGW-Q test). Leaf and tiller numbering according to Katayama (1951).

| Season IV 13 February 2017 43-46 DAS |  |         |                    | n=4          |          |  |         | IR 64              |              | Upland   |  | Hoagland |                    | Mean temp: 32.0°C |                |         |                    | Mean solar radiation : 50.7W/m2 |  |  |  |
|--------------------------------------|--|---------|--------------------|--------------|----------|--|---------|--------------------|--------------|----------|--|----------|--------------------|-------------------|----------------|---------|--------------------|---------------------------------|--|--|--|
| Main tiller                          |  | Eh (mV) | Standard deviation | Ranking (5%) | Tiller 1 |  | Eh (mV) | Standard deviation | Ranking (5%) | Tiller 2 |  | Eh (mV)  | Standard deviation | Ranking (5%)      | Leaf age class | Eh (mV) | Standard deviation | Ranking (5%)                    |  |  |  |
| Leaf 10                              |  |         |                    |              | Leaf 7   |  |         |                    |              | Leaf 6   |  |          |                    |                   | Youngest       |         |                    |                                 |  |  |  |
| Leaf 9                               |  | 265.0   | 13.8               | a            | Leaf 6   |  | 259.2   | 21.7               | a            | Leaf 5   |  | 258.1    | 25.8               | a                 | 1              | 260.8   | 19.3               | a                               |  |  |  |
| Leaf 8                               |  | 234.2   | 7.1                | a            | Leaf 5   |  | 239.0   | 22.3               | a            | Leaf 4   |  | 233.1    | 14.8               | a                 | 2              | 235.4   | 14.7               | b                               |  |  |  |
| Leaf 7                               |  | 239.3   | 14.2               | a            | Leaf 4   |  | 237.3   | 12.9               | a            | Leaf 3   |  | 239.2    | 9.3                | a                 | 3              | 238.6   | 11.2               | b                               |  |  |  |
| Leaf 6                               |  | 228.3   | 9.4                | a            | Leaf 3   |  | 234.7   | 12.5               | a            | Leaf 2   |  | 255.7    | 12.5               | a                 | 4              | 240.0   | 16.3               | b                               |  |  |  |
| Leaf 5                               |  |         |                    |              | Leaf 2   |  |         |                    |              | Leaf 1   |  |          |                    |                   | Oldest         |         |                    |                                 |  |  |  |

| Season IV 13 February 2017 43-46 DAS |  |         |                    | n=4          |          |  |         | IR 64              |              | Lowland  |  | Hoagland |                    | Mean temp: 32.0°C |                |         |                    | Mean solar radiation : 52.4W/m2 |  |  |  |
|--------------------------------------|--|---------|--------------------|--------------|----------|--|---------|--------------------|--------------|----------|--|----------|--------------------|-------------------|----------------|---------|--------------------|---------------------------------|--|--|--|
| Main tiller                          |  | Eh (mV) | Standard deviation | Ranking (5%) | Tiller 1 |  | Eh (mV) | Standard deviation | Ranking (5%) | Tiller 2 |  | Eh (mV)  | Standard deviation | Ranking (5%)      | Leaf age class | Eh (mV) | Standard deviation | Ranking (5%)                    |  |  |  |
| Leaf 10                              |  |         |                    |              | Leaf 7   |  |         |                    |              | Leaf 6   |  |          |                    |                   | Youngest       |         |                    |                                 |  |  |  |
| Leaf 9                               |  | 262.5   | 22.5               | a            | Leaf 6   |  | 252.4   | 4.2                | a            | Leaf 5   |  | 271.6    | 21.9               | a                 | 1              | 262.1   | 18.5               | ab                              |  |  |  |
| Leaf 8                               |  | 248.7   | 7.4                | a            | Leaf 5   |  | 251.5   | 4.1                | a            | Leaf 4   |  | 252.9    | 5.7                | a                 | 2              | 251.0   | 5.6                | b                               |  |  |  |
| Leaf 7                               |  | 255.8   | 8.5                | a            | Leaf 4   |  | 261.2   | 11.1               | a            | Leaf 3   |  | 253.7    | 11.4               | a                 | 3              | 256.9   | 10.0               | ab                              |  |  |  |
| Leaf 6                               |  | 274.4   | 14.9               | a            | Leaf 3   |  | 263.0   | 14.2               | a            | Leaf 2   |  | 269.5    | 14.6               | a                 | 4              | 269.0   | 14.1               | a                               |  |  |  |
| Leaf 5                               |  |         |                    |              | Leaf 2   |  |         |                    |              | Leaf 1   |  |          |                    |                   | Oldest         |         |                    |                                 |  |  |  |

| Season IV 13 February 2017 43-46 DAS |  |         |                    | n=4          |          |  |         | Nerica 4           |              | Lowland  |  | Hoagland |                    | Mean temp: 32.0°C |                |         |                    | Mean solar radiation : 55.06W/m2 |  |  |  |
|--------------------------------------|--|---------|--------------------|--------------|----------|--|---------|--------------------|--------------|----------|--|----------|--------------------|-------------------|----------------|---------|--------------------|----------------------------------|--|--|--|
| Main tiller                          |  | Eh (mV) | Standard deviation | Ranking (5%) | Tiller 1 |  | Eh (mV) | Standard deviation | Ranking (5%) | Tiller 2 |  | Eh (mV)  | Standard deviation | Ranking (5%)      | Leaf age class | Eh (mV) | Standard deviation | Ranking (5%)                     |  |  |  |
| Leaf 10                              |  |         |                    |              | Leaf 7   |  |         |                    |              | Leaf 6   |  |          |                    |                   | Youngest       |         |                    |                                  |  |  |  |
| Leaf 9                               |  | 245.9   | 6.5                | a            | Leaf 6   |  | 247.4   | 34.4               | a            | Leaf 5   |  | 236.6    | 10.0               | a                 | 1              | 243.3   | 19.6               | a                                |  |  |  |
| Leaf 8                               |  | 223.9   | 8.2                | a            | Leaf 5   |  | 224.1   | 3.8                | a            | Leaf 4   |  | 227.4    | 14.9               | a                 | 2              | 225.1   | 9.2                | b                                |  |  |  |
| Leaf 7                               |  | 236.1   | 11.4               | a            | Leaf 4   |  | 231.8   | 15.3               | a            | Leaf 3   |  | 234.1    | 16.3               | a                 | 3              | 234.0   | 13.2               | ab                               |  |  |  |
| Leaf 6                               |  | 237.5   | 12.8               | a            | Leaf 3   |  | 235.3   | 18.9               | a            | Leaf 2   |  | 234.5    | 16.5               | a                 | 4              | 235.7   | 14.8               | ab                               |  |  |  |
| Leaf 5                               |  |         |                    |              | Leaf 2   |  |         |                    |              | Leaf 1   |  |          |                    |                   | Oldest         |         |                    |                                  |  |  |  |

| Season IV 13 February 2017 43-46 DAS |  |      |                    | n=4          |          |  |      | IR 64              |              | Upland   |  | Hoagland |                    | Mean temp: 32.0°C |                |      |                    | Mean solar radiation : 50.7W/m2 |  |  |  |
|--------------------------------------|--|------|--------------------|--------------|----------|--|------|--------------------|--------------|----------|--|----------|--------------------|-------------------|----------------|------|--------------------|---------------------------------|--|--|--|
| Main tiller                          |  | pH   | Standard deviation | Ranking (5%) | Tiller 1 |  | pH   | Standard deviation | Ranking (5%) | Tiller 2 |  | pH       | Standard deviation | Ranking (5%)      | Leaf age class | pH   | Standard deviation | Ranking (5%)                    |  |  |  |
| Leaf 10                              |  |      |                    |              | Leaf 7   |  |      |                    |              | Leaf 6   |  |          |                    |                   | Youngest       |      |                    |                                 |  |  |  |
| Leaf 9                               |  | 6.51 | 0.07               | a            | Leaf 6   |  | 6.58 | 0.19               | a            | Leaf 5   |  | 6.55     | 0.06               | a                 | 1              | 6.55 | 0.10               | a                               |  |  |  |
| Leaf 8                               |  | 6.35 | 0.17               | ab           | Leaf 5   |  | 6.33 | 0.14               | ab           | Leaf 4   |  | 6.46     | 0.13               | a                 | 2              | 6.38 | 0.14               | b                               |  |  |  |
| Leaf 7                               |  | 6.13 | 0.12               | bc           | Leaf 4   |  | 6.13 | 0.14               | bc           | Leaf 3   |  | 6.17     | 0.05               | bc                | 3              | 6.14 | 0.11               | c                               |  |  |  |
| Leaf 6                               |  | 5.93 | 0.14               | c            | Leaf 3   |  | 5.94 | 0.03               | c            | Leaf 2   |  | 5.98     | 0.07               | c                 | 4              | 5.95 | 0.08               | d                               |  |  |  |
| Leaf 5                               |  |      |                    |              | Leaf 2   |  |      |                    |              | Leaf 1   |  |          |                    |                   | Oldest         |      |                    |                                 |  |  |  |

| Season IV 13 February 2017 43-46 DAS |  |      |                    | n=4          |          |  |      | IR 64              |              | Lowland  |  | Hoagland |                    | Mean temp: 32.0°C |                |      |                    | Mean solar radiation : 52.4W/m2 |  |  |  |
|--------------------------------------|--|------|--------------------|--------------|----------|--|------|--------------------|--------------|----------|--|----------|--------------------|-------------------|----------------|------|--------------------|---------------------------------|--|--|--|
| Main tiller                          |  | pH   | Standard deviation | Ranking (5%) | Tiller 1 |  | pH   | Standard deviation | Ranking (5%) | Tiller 2 |  | pH       | Standard deviation | Ranking (5%)      | Leaf age class | pH   | Standard deviation | Ranking (5%)                    |  |  |  |
| Leaf 10                              |  |      |                    |              | Leaf 7   |  |      |                    |              | Leaf 6   |  |          |                    |                   | Youngest       |      |                    |                                 |  |  |  |
| Leaf 9                               |  | 6.44 | 0.10               | ab           | Leaf 6   |  | 6.50 | 0.01               | a            | Leaf 5   |  | 6.55     | 0.01               | a                 | 1              | 6.50 | 0.07               | a                               |  |  |  |
| Leaf 8                               |  | 6.18 | 0.13               | bcd          | Leaf 5   |  | 6.23 | 0.06               | bc           | Leaf 4   |  | 6.11     | 0.16               | cd                | 2              | 6.17 | 0.12               | b                               |  |  |  |
| Leaf 7                               |  | 5.87 | 0.14               | de           | Leaf 4   |  | 5.90 | 0.16               | de           | Leaf 3   |  | 6.09     | 0.27               | cde               | 3              | 5.95 | 0.21               | c                               |  |  |  |
| Leaf 6                               |  | 5.76 | 0.17               | e            | Leaf 3   |  | 5.88 | 0.17               | de           | Leaf 2   |  | 5.86     | 0.17               | de                | 4              | 5.83 | 0.16               | c                               |  |  |  |
| Leaf 5                               |  |      |                    |              | Leaf 2   |  |      |                    |              | Leaf 1   |  |          |                    |                   | Oldest         |      |                    |                                 |  |  |  |

| Season IV 13 February 2017 43-46 DAS |  |      |                    | n=4          |          |  |      | Nerica 4           |              | Lowland  |  | Hoagland |                    | Mean temp: 32.0°C |                |      |                    | Mean solar radiation : 55.06W/m2 |  |  |  |
|--------------------------------------|--|------|--------------------|--------------|----------|--|------|--------------------|--------------|----------|--|----------|--------------------|-------------------|----------------|------|--------------------|----------------------------------|--|--|--|
| Main tiller                          |  | pH   | Standard deviation | Ranking (5%) | Tiller 1 |  | pH   | Standard deviation | Ranking (5%) | Tiller 2 |  | pH       | Standard deviation | Ranking (5%)      | Leaf age class | pH   | Standard deviation | Ranking (5%)                     |  |  |  |
| Leaf 10                              |  |      |                    |              | Leaf 7   |  |      |                    |              | Leaf 6   |  |          |                    |                   | Youngest       |      |                    |                                  |  |  |  |
| Leaf 9                               |  | 6.49 | 0.11               | a            | Leaf 6   |  | 6.57 | 0.1                | a            | Leaf 5   |  | 6.58     | 0.04               | a                 | 1              | 6.55 | 0.09               | a                                |  |  |  |
| Leaf 8                               |  | 6.14 | 0.10               | b            | Leaf 5   |  | 6.13 | 0.08               | b            | Leaf 4   |  | 6.15     | 0.05               | b                 | 2              | 6.14 | 0.07               | b                                |  |  |  |
| Leaf 7                               |  | 6.02 | 0.05               | b            | Leaf 4   |  | 6.01 | 0.05               | b            | Leaf 3   |  | 6.07     | 0.10               | b                 | 3              | 6.03 | 0.07               | c                                |  |  |  |
| Leaf 6                               |  | 5.98 | 0.05               | b            | Leaf 3   |  | 5.99 | 0.13               | b            | Leaf 2   |  | 5.98     | 0.11               | b                 | 4              | 5.98 | 0.09               | c                                |  |  |  |
| Leaf 5                               |  |      |                    |              | Leaf 2   |  |      |                    |              | Leaf 1   |  |          |                    |                   | Oldest         |      |                    |                                  |  |  |  |

| Season IV   | 13 February 2017 | 43-46 DAS          | n=4          |          |             |                    | IR 64        | Upland | Hoagland | Mean temp: 32.0°C |                    |              |                | Mean solar radiation : 50.7W/m2 |                    |              |  |
|-------------|------------------|--------------------|--------------|----------|-------------|--------------------|--------------|--------|----------|-------------------|--------------------|--------------|----------------|---------------------------------|--------------------|--------------|--|
| Main tiller | Eh@pH7 (mV)      | Standard deviation | Ranking (5%) | Tiller 1 | Eh@pH7 (mV) | Standard deviation | Ranking (5%) |        | Tiller 2 | Eh@pH7 (mV)       | Standard deviation | Ranking (5%) | Leaf age class | Eh@pH7 (mV)                     | Standard deviation | Ranking (5%) |  |
| Leaf 10     |                  |                    |              | Leaf 7   |             |                    |              |        | Leaf 6   |                   |                    |              | Youngest       |                                 |                    |              |  |
| Leaf 9      | 235.6            | 14.5               | a            | Leaf 6   | 230.2       | 24.7               | ab           |        | Leaf 5   | 231.3             | 27.7               | ab           | 1              | 232.5                           | 20.5               | a            |  |
| Leaf 8      | 195.2            | 14.4               | abc          | Leaf 5   | 199.1       | 29.8               | abc          |        | Leaf 4   | 200.6             | 18.4               | abc          | 2              | 198.3                           | 19.9               | b            |  |
| Leaf 7      | 186.7            | 16.8               | bc           | Leaf 4   | 184.7       | 19.2               | bc           |        | Leaf 3   | 193.1             | 9.2                | abc          | 3              | 187.7                           | 15.0               | bc           |  |
| Leaf 6      | 165.5            | 18.8               | c            | Leaf 3   | 170.7       | 14.1               | c            |        | Leaf 2   | 188.5             | 3.1                | abc          | 4              | 174.9                           | 15.8               | c            |  |
| Leaf 5      |                  |                    |              | Leaf 2   |             |                    |              |        | Leaf 1   |                   |                    |              | Oldest         |                                 |                    |              |  |

| Season IV   | 13 February 2017 | 43-46 DAS          | n=4          |          |             |                    | IR 64        | Lowland | Hoagland | Mean temp: 32.0°C |                    |              |                | Mean solar radiation : 52.4W/m2 |                    |              |  |
|-------------|------------------|--------------------|--------------|----------|-------------|--------------------|--------------|---------|----------|-------------------|--------------------|--------------|----------------|---------------------------------|--------------------|--------------|--|
| Main tiller | Eh@pH7 (mV)      | Standard deviation | Ranking (5%) | Tiller 1 | Eh@pH7 (mV) | Standard deviation | Ranking (5%) |         | Tiller 2 | Eh@pH7 (mV)       | Standard deviation | Ranking (5%) | Leaf age class | Eh@pH7 (mV)                     | Standard deviation | Ranking (5%) |  |
| Leaf 10     |                  |                    |              | Leaf 7   |             |                    |              |         | Leaf 6   |                   |                    |              | Youngest       |                                 |                    |              |  |
| Leaf 9      | 229.0            | 26.5               | ab           | Leaf 6   | 222.2       | 4.0                | abc          |         | Leaf 5   | 244.7             | 21.7               | a            | 1              | 232.0                           | 20.5               | a            |  |
| Leaf 8      | 199.3            | 5.5                | bc           | Leaf 5   | 205.2       | 6.9                | bc           |         | Leaf 4   | 199.5             | 10.8               | bc           | 2              | 201.3                           | 7.8                | b            |  |
| Leaf 7      | 187.6            | 6.3                | c            | Leaf 4   | 195.0       | 15.7               | bc           |         | Leaf 3   | 198.8             | 9.8                | bc           | 3              | 198.4                           | 11.3               | b            |  |
| Leaf 6      | 199.5            | 16.5               | bc           | Leaf 3   | 195.0       | 10.4               | bc           |         | Leaf 2   | 200.8             | 17.4               | bc           | 4              | 193.8                           | 13.9               | b            |  |
| Leaf 5      |                  |                    |              | Leaf 2   |             |                    |              |         | Leaf 1   |                   |                    |              | Oldest         |                                 |                    |              |  |

| Season IV   | 13 February 2017 | 43-46 DAS          | n=4          |          |             |                    | Nerica 4     | Lowland | Hoagland | Mean temp: 32.0°C |                    |              |                | Mean solar radiation : 55.06W/m2 |                    |              |  |
|-------------|------------------|--------------------|--------------|----------|-------------|--------------------|--------------|---------|----------|-------------------|--------------------|--------------|----------------|----------------------------------|--------------------|--------------|--|
| Main tiller | Eh@pH7 (mV)      | Standard deviation | Ranking (5%) | Tiller 1 | Eh@pH7 (mV) | Standard deviation | Ranking (5%) |         | Tiller 2 | Eh@pH7 (mV)       | Standard deviation | Ranking (5%) | Leaf age class | Eh@pH7 (mV)                      | Standard deviation | Ranking (5%) |  |
| Leaf 10     |                  |                    |              | Leaf 7   |             |                    |              |         | Leaf 6   |                   |                    |              | Youngest       |                                  |                    |              |  |
| Leaf 9      | 214.9            | 5.8                | a            | Leaf 6   | 221.6       | 40.6               | a            |         | Leaf 5   | 211.6             | 8.5                | a            | 1              | 216.0                            | 22.3               | a            |  |
| Leaf 8      | 172.2            | 11.4               | b            | Leaf 5   | 172.1       | 4.8                | b            |         | Leaf 4   | 176.0             | 15.3               | b            | 2              | 175.6                            | 10.4               | b            |  |
| Leaf 7      | 177.0            | 13.4               | b            | Leaf 4   | 171.8       | 13.6               | b            |         | Leaf 3   | 177.9             | 12.0               | b            | 3              | 174.2                            | 12.1               | b            |  |
| Leaf 6      | 176.1            | 10.5               | b            | Leaf 3   | 174.0       | 14.1               | b            |         | Leaf 2   | 172.7             | 10.2               | b            | 4              | 173.4                            | 10.7               | b            |  |
| Leaf 5      |                  |                    |              | Leaf 2   |             |                    |              |         | Leaf 1   |                   |                    |              | Oldest         |                                  |                    |              |  |

Table S3.7. Field condition intra-plant spatial variability of leaf Eh, pH and Eh@pH7 on 44-46 DAS-old plants of the rice variety Nerica 4 in Upland management in season V. Means over 4 plants, standard deviation and rankings based on pairwise comparisons depending on leaf position (Leaf 1 to 9) on five tillers (main and 1 to 4). Across tillers, leaves of the same ages are pooled into 5 age classes (1 to 5 from youngest to oldest), with corresponding means, standard deviations and ranking. Plants were sown in 20 February 2017, rainfed and fertilized with NPK. Measurements were made on the middle part of the leaf. Mean temperature was 33.0°C and mean solar radiation intensity was 55.6W/m<sup>2</sup>. Values followed by different letters indicate significant difference between leaf positions at 95% confidence interval (REGW-Q test). Leaf and tiller numbering according to Katayama (1951).

| Season V    | 20 February 2017 |                    |              | 44-46 DAS |             |                    |              | n=4      |             |                    |              | Nerica 4 |             |                    |              | Rainfed, field condition, NPK |             |                    |              | Mean temp: 33°C |             |                    |              | Mean solar radiation : 55.6W/m2 |  |  |  |  |  |  |  |  |  |  |  |
|-------------|------------------|--------------------|--------------|-----------|-------------|--------------------|--------------|----------|-------------|--------------------|--------------|----------|-------------|--------------------|--------------|-------------------------------|-------------|--------------------|--------------|-----------------|-------------|--------------------|--------------|---------------------------------|--|--|--|--|--|--|--|--|--|--|--|
| Main tiller | Eh (mV)          | Standard deviation | Ranking (5%) | Tiller 1  | Eh (mV)     | Standard deviation | Ranking (5%) | Tiller 2 | Eh (mV)     | Standard deviation | Ranking (5%) | Tiller 3 | Eh (mV)     | Standard deviation | Ranking (5%) | Tiller 4                      | Eh (mV)     | Standard deviation | Ranking (5%) | Leaf age class  | Eh (mV)     | Standard deviation | Ranking (5%) |                                 |  |  |  |  |  |  |  |  |  |  |  |
| Leaf 9      | 228.2            | 21.6               | ab           | Leaf 6    | 231.0       | 2.9                | ab           | Leaf 5   | 234.8       | 7.6                | ab           | Leaf 4   | 245.9       | 17.5               | ab           | Leaf 3                        | 243.1       | 0.2                | ab           | 1               | 244.20      | 22.60              | ab           |                                 |  |  |  |  |  |  |  |  |  |  |  |
| Leaf 8      | 223.6            | 13.9               | ab           | Leaf 5    | 236.0       | 5.2                | ab           | Leaf 4   | 256.1       | 35.1               | ab           | Leaf 3   | 246.1       | 31.5               | ab           | Leaf 2                        | 256.1       | 18.4               | ab           | 2               | 229.90      | 20.90              | b            |                                 |  |  |  |  |  |  |  |  |  |  |  |
| Leaf 7      | 207.0            | 10.8               | b            | Leaf 4    | 229.3       | 6.8                | ab           | Leaf 3   | 238.3       | 25.1               | ab           | Leaf 2   | 254.3       | 28.1               | ab           | Leaf 1                        | 235.9       | 4.8                | ab           | 3               | 242.30      | 23.20              | ab           |                                 |  |  |  |  |  |  |  |  |  |  |  |
| Leaf 6      | 219.1            | 18.9               | b            | Leaf 3    | 253.4       | 12.3               | ab           | Leaf 2   | 258.2       | 20.6               | ab           | Leaf 1   | 253.3       | 16.9               | ab           |                               |             |                    |              | 4               | 255.70      | 29.30              | ab           |                                 |  |  |  |  |  |  |  |  |  |  |  |
| Leaf 5      | 237.3            | 20.4               | ab           | Leaf 2    | 264.2       | 28.9               | ab           | Leaf 1   | 282.7       | 15.4               | a            |          |             |                    |              |                               |             |                    |              | 5               | 250.60      | 20.20              | ab           |                                 |  |  |  |  |  |  |  |  |  |  |  |
| Leaf 4      |                  |                    |              |           |             |                    |              |          |             |                    |              |          |             |                    |              |                               |             |                    |              | Oldest          |             |                    |              |                                 |  |  |  |  |  |  |  |  |  |  |  |
| Main tiller | pH               | Standard deviation | Ranking (5%) | Tiller 1  | pH          | Standard deviation | Ranking (5%) | Tiller 2 | pH          | Standard deviation | Ranking (5%) | Tiller 3 | pH          | Standard deviation | Ranking (5%) | Tiller 4                      | pH          | Standard deviation | Ranking (5%) | Leaf age class  | pH          | Standard deviation | Ranking (5%) |                                 |  |  |  |  |  |  |  |  |  |  |  |
| Leaf 9      | 6.53             | 0.10               | a            | Leaf 6    | 6.49        | 0.21               | a            | Leaf 5   | 6.57        | 0.06               | a            | Leaf 4   | 6.57        | 0.10               | a            | Leaf 3                        | 6.59        | 0.13               | a            | 1               | 6.53        | 0.08               | a            |                                 |  |  |  |  |  |  |  |  |  |  |  |
| Leaf 8      | 6.45             | 0.13               | a            | Leaf 5    | 6.40        | 0.22               | a            | Leaf 4   | 6.35        | 0.23               | a            | Leaf 3   | 6.39        | 0.19               | a            | Leaf 2                        | 6.28        | *                  | a            | 2               | 6.24        | 0.11               | b            |                                 |  |  |  |  |  |  |  |  |  |  |  |
| Leaf 7      | 6.21             | 0.11               | a            | Leaf 4    | 6.20        | 0.13               | a            | Leaf 3   | 6.13        | 0.19               | ab           | Leaf 2   | 6.14        | 0.20               | ab           | Leaf 1                        | 5.83        | 0.18               | ab           | 3               | 6.00        | 0.21               | c            |                                 |  |  |  |  |  |  |  |  |  |  |  |
| Leaf 6      | 6.07             | 0.11               | ab           | Leaf 3    | 6.04        | 0.17               | ab           | Leaf 2   | 5.87        | 0.23               | ab           | Leaf 1   | 5.75        | 0.27               | b            |                               |             |                    |              | 4               | 5.87        | 0.17               | c            |                                 |  |  |  |  |  |  |  |  |  |  |  |
| Leaf 5      | 5.81             | 0.12               | ab           | Leaf 2    | 5.86        | 0.03               | ab           |          |             |                    |              |          |             |                    |              |                               |             |                    |              | 5               | 5.77        | 0.10               | c            |                                 |  |  |  |  |  |  |  |  |  |  |  |
| Leaf 4      |                  |                    |              |           |             |                    |              |          |             |                    |              |          |             |                    |              |                               |             |                    |              | Oldest          |             |                    |              |                                 |  |  |  |  |  |  |  |  |  |  |  |
| Main tiller | Eh@pH7 (mV)      | Standard deviation | Ranking (5%) | Tiller 1  | Eh@pH7 (mV) | Standard deviation | Ranking (5%) | Tiller 2 | Eh@pH7 (mV) | Standard deviation | Ranking (5%) | Tiller 3 | Eh@pH7 (mV) | Standard deviation | Ranking (5%) | Tiller 4                      | Eh@pH7 (mV) | Standard deviation | Ranking (5%) | Leaf age class  | Eh@pH7 (mV) | Standard deviation | Ranking (5%) |                                 |  |  |  |  |  |  |  |  |  |  |  |
| Leaf 9      | 200.1            | 15.7               | a            | Leaf 6    | 200.2       | 9.5                | a            | Leaf 5   | 209.1       | 4.1                | a            | Leaf 4   | 220.2       | 23.4               | a            | Leaf 3                        | 218.6       | 7.5                | a            | 1               | 216.10      | 21.80              | a            |                                 |  |  |  |  |  |  |  |  |  |  |  |
| Leaf 8      | 190.7            | 21.2               | a            | Leaf 5    | 199.8       | 15.7               | a            | Leaf 4   | 217.4       | 44.4               | a            | Leaf 3   | 209.8       | 35.1               | a            | Leaf 2                        | 199.9       | *                  | a            | 2               | 178.80      | 12.70              | b            |                                 |  |  |  |  |  |  |  |  |  |  |  |
| Leaf 7      | 159.3            | 11.7               | a            | Leaf 4    | 181.4       | 7.1                | a            | Leaf 3   | 177.2       | 10.1               | a            | Leaf 2   | 190.1       | 0.2                | a            | Leaf 1                        | 165.5       | 15.9               | a            | 3               | 179.30      | 21.30              | b            |                                 |  |  |  |  |  |  |  |  |  |  |  |
| Leaf 6      | 162.9            | 21.3               | a            | Leaf 3    | 195.6       | 15.1               | a            | Leaf 2   | 202.6       | 3.1                | a            | Leaf 1   | 178.2       | 26.1               | a            |                               |             |                    |              | 4               | 182.00      | 31.20              | b            |                                 |  |  |  |  |  |  |  |  |  |  |  |
| Leaf 5      | 165.7            | 23.5               | a            | Leaf 2    | 193.4       | 45.8               | a            | Leaf 1   | 226.6       | *                  | a            |          |             |                    |              |                               |             |                    |              | 5               | 166.20      | 7.40               | b            |                                 |  |  |  |  |  |  |  |  |  |  |  |
| Leaf 4      |                  |                    |              |           |             |                    |              |          |             |                    |              |          |             |                    |              |                               |             |                    |              | Oldest          |             |                    |              |                                 |  |  |  |  |  |  |  |  |  |  |  |



Table S.4. Means and pairwise comparisons of Eh, pH and Eh@pH7 for four rice varieties (IDSA 6, Azucena, IRBLTA2Pi, Nerica4) in four growing seasons (I to IV) and increasing plant age (DAS from 39 to 74). When data were collected on successive days, pooled data are also analyzed (e.g. 73-74DAS). Plants were sown in 12 November 2015, 25 April 2016, 12 August 2016 and 02 December in season I to IV, respectively, then grown in aerobic conditions, not fertilized in season I, fertilized with NPK in seasons II and III and Hoagland's solution in season IV. Measurements were made on the middle part of the last photosynthetically active leaf of the main tiller. Mean temperature and solar radiation intensity are indicated. Values followed by different letters indicate significant difference between varieties at 95% confidence interval (REGW-Q test). F and P values of the ANOVA are indicated.

| Season I    | DAS       | n  | Varieties  |         |         | F     | P                 | Mean Temp. (°C) | Mean Solar rad. (Wm-2) |
|-------------|-----------|----|------------|---------|---------|-------|-------------------|-----------------|------------------------|
|             |           |    | IRBLTA-2Pi | IDSA 6  | Nerica4 |       |                   |                 |                        |
| Eh (mV)     | 48 DAS    | 10 | 269.4 a    | 263.5 a | 264.9 a | 0.41  | 0.666             | 25.63           | 38.88                  |
|             | 73 DAS    | 10 | 267.3 a    | 256.8 b | 269.9 a | 10.40 | <b>0.000</b>      | 29.57           | 68.42                  |
|             | 74 DAS    | 10 | 267.8 a    | 261.6 a | 267.3 a | 1.24  | 0.306             | 29.10           | 71.92                  |
|             | 73-74 DAS | 20 | 267.6 a    | 259.2 b | 268.6 a | 7.59  | <b>0.001</b>      | 29.37           | 70.16                  |
| pH          | 48 DAS    | 10 | 6.70 a     | 6.82 a  | 6.39 b  | 13.43 | <b>&lt;0.0001</b> | 25.63           | 38.88                  |
|             | 73 DAS    | 10 | 6.28 a     | 6.19 ab | 6.15 b  | 3.29  | 0.053             | 29.57           | 68.42                  |
|             | 74 DAS    | 10 | 6.45 a     | 6.43 a  | 6.09 b  | 14.23 | <b>&lt;0.0001</b> | 29.10           | 71.92                  |
|             | 73-74 DAS | 20 | 6.37 a     | 6.31 a  | 6.12 b  | 11.92 | <b>&lt;0.0001</b> | 29.37           | 70.16                  |
| Eh@pH7 (mV) | 48 DAS    | 10 | 251.8 a    | 252.6 a | 228.7 b | 4.49  | <b>0.021</b>      | 25.63           | 38.88                  |
|             | 73 DAS    | 10 | 224.1 a    | 208.5 b | 218.8 a | 6.10  | <b>0.007</b>      | 29.57           | 68.42                  |
|             | 74 DAS    | 10 | 235.3 a    | 228.0 a | 213.2 b | 6.47  | <b>0.005</b>      | 29.10           | 71.92                  |
|             | 73-74 DAS | 20 | 229.8 a    | 218.2 b | 216.0 b | 5.73  | <b>0.005</b>      | 29.37           | 70.16                  |

  

| Season II   | DAS          | n  | Varieties  |         |         | F     | P                 | Mean Temp. (°C) | Mean Solar rad. (Wm-2) |
|-------------|--------------|----|------------|---------|---------|-------|-------------------|-----------------|------------------------|
|             |              |    | IRBLTA-2Pi | IDSA 6  | Nerica4 |       |                   |                 |                        |
| Eh (mV)     | 56 DAS       | 10 | 262.1 a    | 259.2 a | 255.0 a | 1.83  | 0.181             | 27.81           | 30.12                  |
|             | 57 DAS       | 10 | 257.2 a    | 260.1 a | 255.7 a | 0.35  | 0.709             | 29.83           | 66.42                  |
|             | 59 DAS       | 10 | 264.1 a    | 262.8 a | 249.7 b | 6.34  | <b>0.006</b>      | 29.66           | 76.56                  |
|             | 56-57-59 DAS | 30 | 261.0 a    | 260.6 a | 253.6 b | 5.05  | <b>0.008</b>      | 29.10           | 57.70                  |
| pH          | 56 DAS       | 10 | 6.24 a     | 5.92 b  | 6.00 b  | 26.76 | <b>&lt;0.0001</b> | 27.81           | 30.12                  |
|             | 57 DAS       | 10 | 6.04 a     | 6.00 a  | 5.97 a  | 0.46  | 0.639             | 29.83           | 66.42                  |
|             | 59 DAS       | 10 | 6.24 a     | 5.97 b  | 5.95 b  | 13.24 | <b>0.000</b>      | 29.66           | 76.56                  |
|             | 56-57-59 DAS | 30 | 6.17 a     | 5.96 b  | 5.97 b  | 19.66 | <b>&lt;0.0001</b> | 29.10           | 57.70                  |
| Eh@pH7 (mV) | 56 DAS       | 10 | 216.7 a    | 194.6 b | 195.1 b | 16.96 | <b>&lt;0.0001</b> | 27.81           | 30.12                  |
|             | 57 DAS       | 10 | 199.5 a    | 199.4 a | 194.0 a | 0.48  | 0.622             | 29.83           | 66.42                  |
|             | 59 DAS       | 10 | 218.6 a    | 200.9 b | 186.4 c | 14.84 | <b>&lt;0.0001</b> | 29.66           | 76.56                  |
|             | 56-57-59 DAS | 30 | 211.3 a    | 198.2 b | 192.0 b | 16.22 | <b>&lt;0.0001</b> | 29.10           | 57.70                  |

  

| Season III  | DAS    | n  | Varieties  |         |         | F     | P            | Mean Temp. (°C) | Mean Solar rad. (Wm-2) |
|-------------|--------|----|------------|---------|---------|-------|--------------|-----------------|------------------------|
|             |        |    | IRBLTA-2Pi | Azucena | Nerica4 |       |              |                 |                        |
| Eh (mV)     | 39 DAS | 20 | 243.3 a    | 247.8 a | 239.5 a | 1.48  | 0.245        | 28.47           | 53.14                  |
|             | 40 DAS | 10 | 241.8 b    | 253.8 a | 235.7 b | 11.83 | <b>0.000</b> | 29.97           | 49.96                  |
| pH          | 39 DAS | 20 | 6.29 a     | 6.03 b  | 6.19 a  | 7.09  | <b>0.003</b> | 28.47           | 53.14                  |
|             | 40 DAS | 10 | 6.21 a     | 6.09 b  | 6.16 ab | 2.90  | 0.074        | 29.97           | 49.96                  |
| Eh@pH7 (mV) | 39 DAS | 20 | 200.9 a    | 189.8 a | 191.3 a | 1.90  | 0.170        | 28.47           | 53.14                  |
|             | 40 DAS | 10 | 195.0 a    | 199.2 a | 185.0 b | 4.27  | <b>0.026</b> | 29.97           | 49.96                  |

  

| Season IV   | DAS    | n  | Varieties  |         |         | F     | P                 | Mean Temp. (°C) | Mean Solar rad. (Wm-2) |
|-------------|--------|----|------------|---------|---------|-------|-------------------|-----------------|------------------------|
|             |        |    | IRBLTA-2Pi | Azucena | Nerica4 |       |                   |                 |                        |
| Eh (mV)     | 39 DAS | 20 | 250.7 a    | 246.1 a | 240.3 b | 4.13  | <b>0.027</b>      | 27.43           | 30.67                  |
|             | 40 DAS | 10 | 254.8 ab   | 258.4 a | 246.9 b | 3.67  | <b>0.039</b>      | 28.03           | 26.74                  |
| pH          | 39 DAS | 20 | 6.79 a     | 6.44 b  | 6.50 b  | 23.27 | <b>&lt;0.0001</b> | 27.43           | 30.67                  |
|             | 40 DAS | 10 | 6.80 a     | 6.56 b  | 6.38 c  | 33.30 | <b>&lt;0.0001</b> | 28.03           | 26.74                  |
| Eh@pH7 (mV) | 39 DAS | 20 | 239.0 a    | 210.6 b | 210.2 b | 35.86 | <b>&lt;0.0001</b> | 27.43           | 30.67                  |
|             | 40 DAS | 10 | 242.8 a    | 231.9 b | 210.0 c | 17.14 | <b>&lt;0.0001</b> | 28.03           | 26.74                  |

Table S5.1. Means and pairwise comparisons of Eh, pH and Eh@pH7 in three growing seasons (II, III, IV) for two rice varieties (IRBLTA2Pi, Nerica4) at 59-60 DAS. Plants were sown 25 April 2016 in season II, 12 August 2016 in season III and 02 December in season IV, then grown in aerobic conditions (“upland” management), fertilized with NPK in seasons II to III and Hoagland’s solution in season IV. Measurements were made on the middle part of the last photosynthetically active leaf of the main tiller. Values followed by different letters indicate significant difference between seasons at 95% confidence interval (REGW-Q test). F and P values of the ANOVA are indicated.

|                           | Variety    | n  | Season    |            |           | F     | P                 |
|---------------------------|------------|----|-----------|------------|-----------|-------|-------------------|
|                           |            |    | Season II | Season III | Season IV |       |                   |
| Eh<br>(mV)                | Nerica4    | 10 | 249.6 c   | 265.2 a    | 256.5 b   | 12.09 | <b>0.000</b>      |
|                           | IRBLTA-2Pi | 10 | 264.1 a   | 276.8 a    | 267.2 a   | 3.08  | 0.063             |
| pH                        | Nerica4    | 10 | 5.95 a    | 5.85 b     | 5.76 c    | 12.84 | <b>0.000</b>      |
|                           | IRBLTA-2Pi | 10 | 6.24 a    | 6.17 a     | 5.89 b    | 37.57 | <b>&lt;0.0001</b> |
| Eh@pH7<br>(mV)            | Nerica4    | 10 | 186.4 b   | 196.4 a    | 182.1 b   | 6.39  | <b>0.006</b>      |
|                           | IRBLTA-2Pi | 10 | 218.6 a   | 226.8 a    | 200.5 b   | 9.68  | <b>0.001</b>      |
| Temperature<br>(°C)       | Nerica4    | 10 | 29.71 a   | 29.25 a    | 29.43 a   | 0.69  | 0.511             |
|                           | IRBLTA-2Pi | 10 | 29.72 a   | 29.20 a    | 29.43 a   | 0.80  | 0.459             |
| Solar radiation<br>(W/m2) | Nerica4    | 10 | 68.91 a   | 28.44 b    | 38.13 b   | 12.25 | <b>0.000</b>      |
|                           | IRBLTA-2Pi | 10 | 77.35 a   | 27.66 b    | 34.68 b   | 15.45 | <b>&lt;0.0001</b> |

Table S5.2.

Means and pairwise comparisons of Eh, pH and Eh@pH7 in two growing seasons (III, IV) for three rice varieties (Azucena, IRBLTA2Pi, Nerica4) at 39-40 DAS. Plants were sown 12 August 2016 in season III and 02 December in season IV, then grown in aerobic conditions, fertilized with NPK in season III and Hoagland's solution in season IV. Measurements were made on the middle part of the last photosynthetically active leaf of the main tiller. Mean temperature and solar radiation intensity are indicated. Values followed by different letters indicate significant difference between varieties at 95% confidence interval (REGW-Q test). F and P values of the ANOVA are indicated.

|                                        | Variety    | n  | Season     |           | F      | P                 |
|----------------------------------------|------------|----|------------|-----------|--------|-------------------|
|                                        |            |    | Season III | Season IV |        |                   |
| Eh<br>(mV)                             | Nerica4    | 20 | 237.6 b    | 243.6 a   | 4.10   | <b>0.050</b>      |
|                                        | Azucena    | 20 | 250.8 a    | 252.3 a   | 0.25   | 0.621             |
|                                        | IRBLTA-2Pi | 20 | 242.6 b    | 252.8 a   | 9.56   | <b>0.004</b>      |
| pH                                     | Nerica4    | 20 | 6.18 b     | 6.44 a    | 55.61  | <b>&lt;0.0001</b> |
|                                        | Azucena    | 20 | 6.06 b     | 6.50 a    | 100.26 | <b>&lt;0.0001</b> |
|                                        | IRBLTA-2Pi | 20 | 6.24 b     | 6.79 a    | 174.10 | <b>&lt;0.0001</b> |
| Eh@pH7<br>(mV)                         | Nerica4    | 20 | 188.2 b    | 210.1 a   | 38.14  | <b>&lt;0.0001</b> |
|                                        | Azucena    | 20 | 194.2 b    | 222.4 a   | 39.29  | <b>&lt;0.0001</b> |
|                                        | IRBLTA-2Pi | 20 | 198.1 b    | 241.0 a   | 112.49 | <b>&lt;0.0001</b> |
| Temperature<br>(°C)                    | Nerica4    | 20 | 29.23 a    | 27.72 b   | 12.22  | <b>0.001</b>      |
|                                        | Azucena    | 20 | 29.22 a    | 27.77 b   | 12.30  | <b>0.001</b>      |
|                                        | IRBLTA-2Pi | 20 | 29.21 a    | 27.70 b   | 11.91  | <b>0.001</b>      |
| Solar radiation<br>(W/m <sup>2</sup> ) | Nerica4    | 20 | 51.69 a    | 28.66 b   | 10.51  | <b>0.002</b>      |
|                                        | Azucena    | 20 | 50.19 a    | 28.83 b   | 11.13  | <b>0.002</b>      |
|                                        | IRBLTA-2Pi | 20 | 51.25 a    | 29.63 b   | 10.32  | <b>0.003</b>      |

Figure S1. Measurement of leaf Eh and pH in a field laboratory to prevent electromagnetic interference

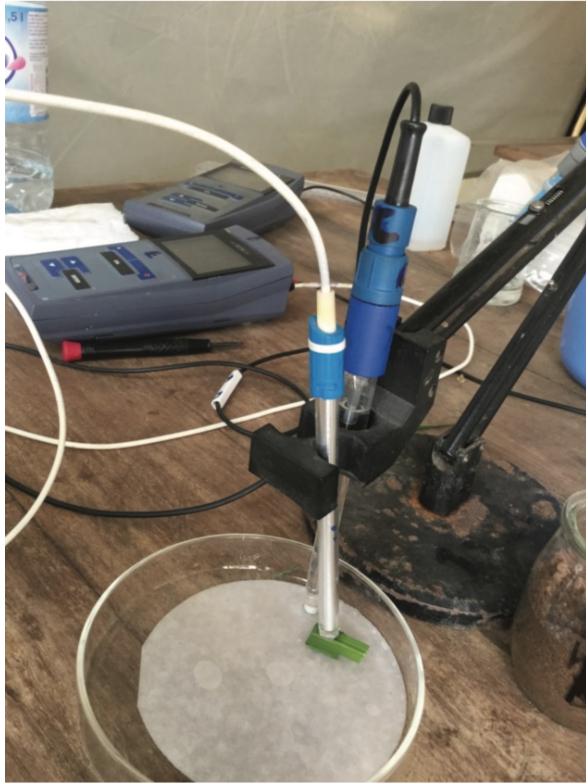

Eh measurement in leaf

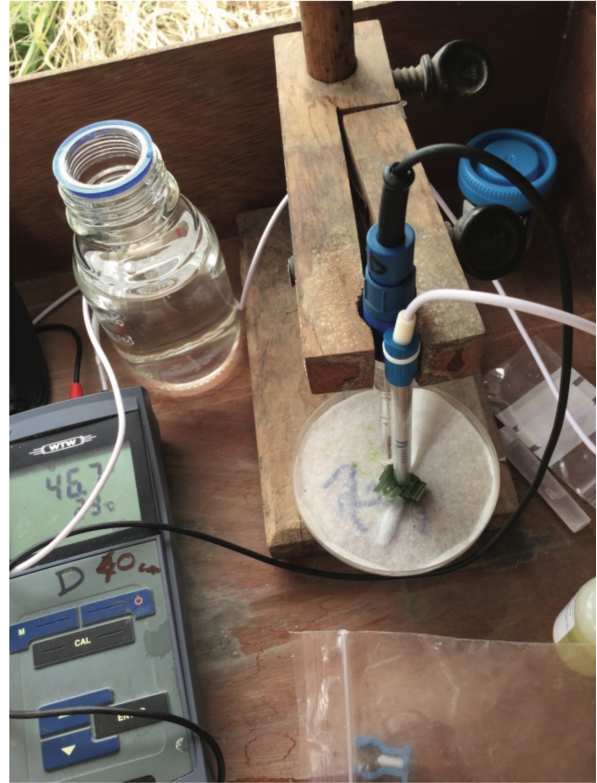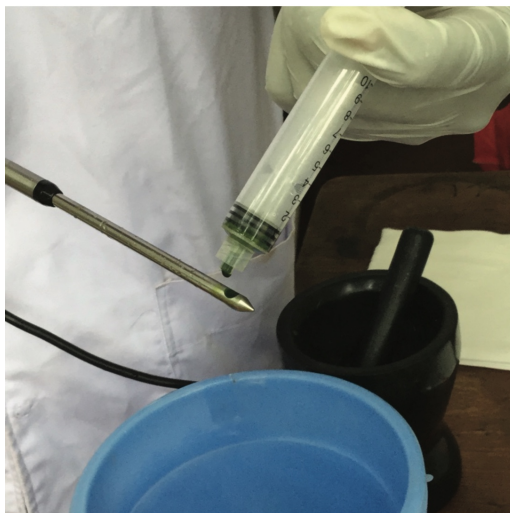

pH measurement in leaf

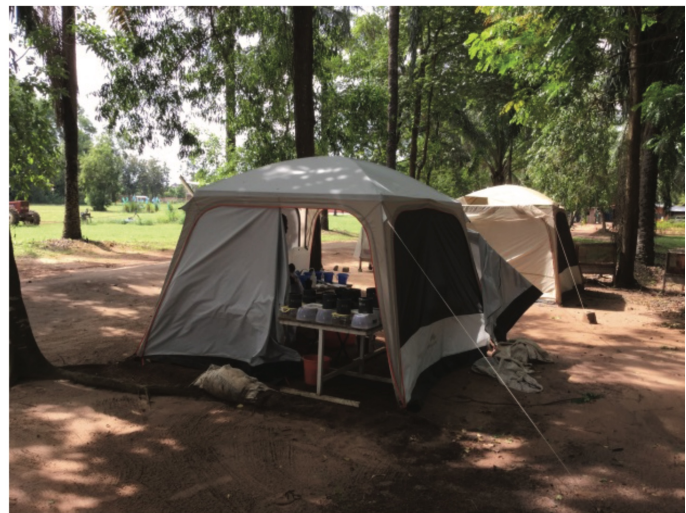

Field laboratory, free from electromagnetic interference
